# Supplementary material for: Rapid decline of bacterial drug-resistance in an antibiotic-free environment through phenotypic reversion
Source: eLife journal article supplement (doi:10.7554/elife.47088), 2019-08-16
Supplement: supp [file elife-47088-supp-v1.zip]

Archive with 11 entries (11 files):
- elife_poa_e47088_Figure_5_figure_supplement_1.pdf
- elife_poa_e47088_Figure_2_source_data_1.xlsx
- elife_poa_e47088_Figure_1_figure_supplement_1.pdf
- elife_poa_e47088_Figure_3_source_data_1.xlsx
- elife_poa_e47088_Supplementary_file1.xlsx
- elife_poa_e47088_Figure_5_source_data_1.xlsx
- elife_poa_e47088_Figure_4_source_data_1.xlsx
- elife_poa_e47088_Transparent_Reporting_File.docx
- elife_poa_e47088_Figure_5_figure_supplement_2.pdf
- elife_poa_e47088_Figure_4_figure_supplement_1.pdf
- elife_poa_e47088_Figure_1_source_data_1.xlsx
