# Supplementary material for: Rapid decline of bacterial drug-resistance in an antibiotic-free environment through phenotypic reversion
Source: eLife journal article supplement (doi:10.7554/elife.47088), 2019-08-16
Supplement: supp [file elife-47088-supp-v1.zip › elife_poa_e47088_Figure_1_source_data_1.xlsx]

## Sheet: Description
Figure 1-source data. Initial fitness cost of the T0 antibiotic-resistant strains.
Sheet 'Figure 1 - all T0 fitness'	This spreadsheet contains the data for all 60 T0 antibiotic-resistant strain (Figure 1):
	T0 strain	T0 antibiotic-resistant strain.
	Antibiotic adapted to	Abbreviation of antibiotic to which the T0 antibiotic-resistant strain had been previously adapted to.
	Relative fitness	Fitness was measured as the area under the growth curve in antibiotic-free medium. Relative fitness was calculated as the median of the normalized integral of the technical replicates for each T0 strain divided by the median fitness of the wild-type controls.
	Fitness cost	Fitness cost was calculated from the absolute fitness of T0 and wild-type strains using the following equation: 1-WT0/Wwild-type, where WT0 and Wwild-type indicate fitness of the T0 and wild-type strains, respectively.
	P-value	FDR adjusted p-values determined by Mann–Whitney U test. Significance was defined as P-value<0.05
Sheet 'Significant fitness cost'	This spreadsheet contains the following data for the 24 T0 antibiotic-resistant strain exhibiting significant fitness cost in antibiotic-free medium:
	T0 strain	T0 antibiotic-resistant strain.
	Antibiotic adapted to	Abbreviation of antibiotic to which the T0 antibiotic-resistant strain had been previously adapted to.
	Relative fitness	Fitness was measured as the area under the growth curve in antibiotic-free medium. Relative fitness was calculated as the median of the normalized integral of the technical replicates for each T0 strain divided by the median fitness of the wild-type controls.
	Fitness cost	Fitness cost was calculated from the absolute fitness of T0 and wild-type strains using the following equation: 1-WT0/Wwild-type, where WT0 and Wwild-type indicate fitness of the T0 and wild-type strains, respectively.
	P-value	FDR adjusted p-values determined by Mann–Whitney U test. Significance was defined as P-value<0.05
	# of mutations	Number of mutations identified in the T0 antibiotic-resistant strain by whole-genome sequencing.
	Relative MIC	Level of resistance of the T0 antibiotic-resistant strain determined as fold change increase in the minimum inhibitory concentration (MIC) of the antibiotic to which the strain had been previously adapted to compared to the wild-type MIC.

## Sheet: Figure 1 - all T0 fitness
T0 strain	Antibiotic adapted to	Relative fitness	Fitness cost	P-value
AMP2	AMP	1.01	0	1
AMP7	AMP	1.13	0	1
AMP8	AMP	0.97	0.03	0.0196911
AMP9	AMP	0.98	0.02	0.303422
CHL2	CHL	0.91	0.09	4.32947e-18
CHL3	CHL	1.07	0	1
CHL5	CHL	1.06	0	1
CHL7	CHL	0.96	0.04	0.000129511
CHL9	CHL	1.02	0	1
CIP3	CIP	1.02	0	1
CIP4	CIP	1	0	0.876108
CIP5	CIP	0.68	0.32	4.07254e-45
CIP7	CIP	0.98	0.02	0.104327
CIP9	CIP	0.81	0.19	6.66445e-32
DOX1	DOX	1.15	0	1
DOX2	DOX	1.01	0	1
DOX3	DOX	0.97	0.03	0.0224124
DOX5	DOX	1.1	0	1
ERY1	ERY	1.09	0	1
ERY2	ERY	1	0	1
ERY5	ERY	1.07	0	1
ERY6	ERY	1.2	0	1
ERY8	ERY	1.18	0	1
FOX1	FOX	1.22	0	1
FOX2	FOX	1.07	0	1
FOX6	FOX	1.13	0	1
FOX7	FOX	1.06	0	1
FOX8	FOX	0.93	0.07	4.50766e-08
KAN1	KAN	0.78	0.22	5.10639e-34
KAN4	KAN	0.61	0.39	4.00193e-43
KAN6	KAN	0.7	0.3	2.53379e-08
KAN8	KAN	0.64	0.36	3.7747e-20
KAN9	KAN	1.05	0	1
NAL1	NAL	1.02	0	1
NAL3	NAL	1.08	0	1
NAL6	NAL	1.16	0	1
NAL7	NAL	1.19	0	1
NAL8	NAL	1.06	0	1
NAL9	NAL	1.03	0	1
NIT2	NIT	0.94	0.06	2.57969e-05
NIT3	NIT	1.04	0	1
NIT4	NIT	1.12	0	1
NIT6	NIT	1.03	0	1
NIT7	NIT	1.14	0	1
NIT8	NIT	0.9	0.1	2.37389e-16
TET1	TET	1	0	0.507878
TET2	TET	1	0	1
TET3	TET	0.95	0.05	0.00159264
TET7	TET	1.04	0	1
TET8	TET	0.9	0.1	1.09053e-08
TOB10	TOB	0.82	0.18	2.42602e-38
TOB3	TOB	1.11	0	1
TOB4	TOB	0.6	0.4	2.07443e-45
TOB8	TOB	0.63	0.37	6.04434e-24
TOB9	TOB	0.7	0.3	1.44502e-40
TMP10	TMP	0.95	0.05	0.000717598
TMP2	TMP	0.93	0.07	1.30944e-08
TMP6	TMP	1.03	0	1
TMP7	TMP	0.97	0.03	0.0196911
TMP9	TMP	0.94	0.06	4.34784e-06

## Sheet: Significant fitness cost
T0 strain	Antibiotic adapted to	Relative fitness	Fitness cost	P-value	# of mutations	Relative MIC
AMP8	AMP	0.970413	0.03	0.0196911	5	24
CHL2	CHL	0.908178	0.09	4.32947e-18	4	32
CHL7	CHL	0.95648	0.04	0.000129511	5	32
CIP5	CIP	0.677573	0.32	4.07254e-45	4	521.739
CIP9	CIP	0.81324	0.19	6.66445e-32	13	130.435
DOX3	DOX	0.967221	0.03	0.0224124	2	32
FOX8	FOX	0.928476	0.07	4.50766e-08	6	128
KAN1	KAN	0.778765	0.22	5.10639e-34	7	128
KAN4	KAN	0.611048	0.39	4.00193e-43	8	128
KAN6	KAN	0.696729	0.3	2.53379e-08	8	16
KAN8	KAN	0.6366	0.36	3.7747e-20	12	85.3333
NIT2	NIT	0.935326	0.06	2.57969e-05	4	85.3333
NIT8	NIT	0.89888	0.1	2.37389e-16	7	85.3333
TET3	TET	0.951959	0.05	0.00159264	2	24
TET8	TET	0.901619	0.1	1.09053e-08	3	16
TOB10	TOB	0.815705	0.18	2.42602e-38	6	336.842
TOB4	TOB	0.598477	0.4	2.07443e-45	13	673.684
TOB8	TOB	0.631853	0.37	6.04434e-24	11	673.684
TOB9	TOB	0.702503	0.3	1.44502e-40	13	673.684
TMP10	TMP	0.948989	0.05	0.000717598	4	16
TMP2	TMP	0.927676	0.07	1.30944e-08	3	16
TMP7	TMP	0.968005	0.03	0.0196911	2	16
TMP9	TMP	0.937128	0.06	4.34784e-06	5	8
