# Supplementary material for: Rapid decline of bacterial drug-resistance in an antibiotic-free environment through phenotypic reversion
Source: eLife journal article supplement (doi:10.7554/elife.47088), 2019-08-16
Supplement: supp [file elife-47088-supp-v1.zip › elife_poa_e47088_Figure_2_source_data_1.xlsx]

## Sheet: Description
Figure 2-source data. Fitness improvement reached following 60-day evolution in an antibiotic free environment.
Sheet 'Figure 2 - all T60 fitness'	This spreadsheet contains the following data for all 144 T60 evolved line:
	T60 line	T60 lines evolved in antibiotic free environment.
	Corresponding T0 strain	T0 antibiotic-resistant strains from which the evolution of the corresponding T60 line was initiated in the antibiotic free environment.
	Antibiotic adapted to	Abbreviation of antibiotic to which the T0 antibiotic-resistant strain had been previously adapted to.
	Fitness at T0	Fitness was measured as the area under the growth curve in antibiotic-free medium. Relative fitness was calculated as the median of the normalized integral of the technical replicates for each T0 strain divided by the median fitness of the wild-type controls.
	Number of points at T0	Number of replicates at T0
	Fitness at T60	Fitness was measured as the area under the growth curve in antibiotic-free medium. Relative fitness was calculated as the median of the normalized integral of the technical replicates for each T60 line divided by the median fitness of the wild-type controls.
	Number of points at T60	Number of replicates at T60
	Relative fitness	Fitness at T60 relative to fitness at T0
	Significance of fitness improvement (P-value)	FDR adjusted p-values determined by Mann–Whitney U test. Significance was defined as P-value<0.05
Sheet 'Significant improvement'	This spreadsheet contains the following data for the 71 T60 evolved lines exhibiting significant fitness improvement compared to the corresponding T0 strain:
	T60 line	T60 lines evolved in antibiotic free environment.
	Resistance	Resistance level of the T60 evolved lines:
			complete loss was defined as an MIC decrease below the CLSI clinical breakpoint for sensitivity towards all tested antibiotics
			partial loss was defined as an MIC decrease below the CLSI clinical breakpoint for sensitivity towards at least one antibiotic
			no loss was defined as MIC maintained above the CLSI clinical breakpoint for resistance towards all tested antibiotics
	Fitness improvement	Fitness improvement was calculated as the relative fitness of the T60 line divided by the relative fitness of the corresponding T0 strain.

## Sheet: Figure 2 - all T60 fitness
T60 line	Corresponding T0 strain	Antibiotic adapted to	Fitness at T0	Number of points at T0	Fitness at T60	Number of points at T60	Relative fitness	Significance of fitness improvement (P-value)
AMP8a	AMP8	AMP	0.970413	90	0.918795	15	0.946808	1
AMP8b	AMP8	AMP	0.970413	90	0.998993	15	1.02945	0.142258
AMP8c	AMP8	AMP	0.970413	90	0.903571	15	0.931119	1
AMP8d	AMP8	AMP	0.970413	90	0.860033	15	0.886255	1
AMP8e	AMP8	AMP	0.970413	90	1.05853	15	1.0908	0.0104827
AMP8f	AMP8	AMP	0.970413	90	0.862075	15	0.888358	1
CHL2a	CHL2	CHL	0.908178	90	0.681396	15	0.750289	1
CHL2b	CHL2	CHL	0.908178	90	0.973349	15	1.07176	0.000921559
CHL2c	CHL2	CHL	0.908178	90	0.930013	15	1.02404	0.0560719
CHL2d	CHL2	CHL	0.908178	90	0.822591	15	0.90576	1
CHL2e	CHL2	CHL	0.908178	90	0.844659	15	0.930059	1
CHL2f	CHL2	CHL	0.908178	90	1.01485	15	1.11746	8.77e-07
CHL7a	CHL7	CHL	0.95648	90	0.750168	15	0.784301	1
CHL7b	CHL7	CHL	0.95648	90	0.968994	15	1.01308	0.406131
CHL7c	CHL7	CHL	0.95648	90	0.86691	15	0.906355	1
CHL7d	CHL7	CHL	0.95648	90	0.877792	15	0.917732	1
CHL7e	CHL7	CHL	0.95648	90	0.765392	15	0.800217	1
CHL7f	CHL7	CHL	0.95648	90	0.827627	15	0.865285	1
CIP5a	CIP5	CIP	0.677573	90	0.907158	15	1.33883	8.27e-08
CIP5b	CIP5	CIP	0.677573	90	0.869398	15	1.28311	3.01e-05
CIP5c	CIP5	CIP	0.677573	90	1.21017	15	1.78603	7.87e-09
CIP5d	CIP5	CIP	0.677573	90	1.01856	15	1.50325	4.52e-08
CIP5e	CIP5	CIP	0.677573	90	0.753306	15	1.11177	0.00112634
CIP5f	CIP5	CIP	0.677573	90	1.05501	15	1.55705	7.94e-09
CIP9a	CIP9	CIP	0.81324	90	1.17299	15	1.44236	7.87e-09
CIP9b	CIP9	CIP	0.81324	90	0.936726	15	1.15184	0.00282936
CIP9c	CIP9	CIP	0.81324	90	0.715088	15	0.879308	1
CIP9e	CIP9	CIP	0.81324	90	0.6073	15	0.746766	1
CIP9f	CIP9	CIP	0.81324	90	0.954924	15	1.17422	0.000581366
DOX3a	DOX3	DOX	0.967221	90	1.21098	15	1.25202	1.16e-08
DOX3b	DOX3	DOX	0.967221	90	1.32158	15	1.36637	7.87e-09
DOX3c	DOX3	DOX	0.967221	90	1.24468	15	1.28686	1.06e-08
DOX3d	DOX3	DOX	0.967221	90	1.13227	15	1.17064	1.7e-06
DOX3e	DOX3	DOX	0.967221	90	1.17899	15	1.21894	1.16e-08
DOX3f	DOX3	DOX	0.967221	90	0.9727	15	1.00567	0.331699
FOX8a	FOX8	FOX	0.928476	90	1.04784	15	1.12856	2.61e-05
FOX8b	FOX8	FOX	0.928476	90	1.19305	15	1.28495	4.52e-08
FOX8c	FOX8	FOX	0.928476	90	0.995572	15	1.07227	0.0183906
FOX8d	FOX8	FOX	0.928476	90	0.855065	15	0.920934	1
FOX8e	FOX8	FOX	0.928476	90	1.01632	15	1.09461	0.00112634
FOX8f	FOX8	FOX	0.928476	90	1.06668	15	1.14885	0.000634216
KAN1a	KAN1	KAN	0.778765	90	0.891493	15	1.14475	0.000118881
KAN1b	KAN1	KAN	0.778765	90	0.942829	15	1.21067	7.56e-06
KAN1c	KAN1	KAN	0.778765	90	0.988639	15	1.2695	3.88e-06
KAN1d	KAN1	KAN	0.778765	90	1.14752	15	1.47351	1.16e-08
KAN1e	KAN1	KAN	0.778765	90	1.02872	15	1.32097	4.37e-08
KAN1f	KAN1	KAN	0.778765	90	0.987856	15	1.26849	5.83e-07
KAN4a	KAN4	KAN	0.611048	90	0.696295	15	1.13951	1.44e-06
KAN4b	KAN4	KAN	0.611048	90	0.858643	15	1.4052	2.76e-08
KAN4c	KAN4	KAN	0.611048	90	0.71032	15	1.16246	9.42e-05
KAN4d	KAN4	KAN	0.611048	90	0.665152	15	1.08854	0.000646013
KAN4e	KAN4	KAN	0.611048	90	0.717439	15	1.17411	5.18e-07
KAN4f	KAN4	KAN	0.611048	90	0.683334	15	1.1183	0.000225186
KAN6a	KAN6	KAN	0.696729	90	0.74136	15	1.06406	0.646818
KAN6b	KAN6	KAN	0.696729	90	0.599799	15	0.860878	1
KAN6c	KAN6	KAN	0.696729	90	0.706619	15	1.01419	1
KAN6d	KAN6	KAN	0.696729	90	0.633016	15	0.908553	1
KAN6e	KAN6	KAN	0.696729	90	0.66817	15	0.959009	1
KAN6f	KAN6	KAN	0.696729	90	0.736053	15	1.05644	0.589956
KAN8a	KAN8	KAN	0.6366	90	0.873411	15	1.37199	0.000247014
KAN8b	KAN8	KAN	0.6366	90	0.607936	15	0.954973	1
KAN8c	KAN8	KAN	0.6366	90	0.656254	15	1.03087	0.600189
KAN8d	KAN8	KAN	0.6366	90	0.634731	15	0.997063	0.986716
KAN8e	KAN8	KAN	0.6366	90	0.607545	15	0.954358	1
KAN8f	KAN8	KAN	0.6366	90	0.596501	15	0.937011	1
NIT2a	NIT2	NIT	0.935326	90	0.989157	15	1.05755	0.0805826
NIT2b	NIT2	NIT	0.935326	90	0.79162	15	0.846357	1
NIT2c	NIT2	NIT	0.935326	90	0.956772	15	1.02293	0.987139
NIT2d	NIT2	NIT	0.935326	90	0.803968	15	0.859558	1
NIT2e	NIT2	NIT	0.935326	90	0.936698	15	1.00147	0.938757
NIT2f	NIT2	NIT	0.935326	90	0.839735	15	0.897799	1
NIT8a	NIT8	NIT	0.89888	90	0.939225	15	1.04488	0.0115206
NIT8b	NIT8	NIT	0.89888	90	1.21583	15	1.35261	1.16e-08
NIT8c	NIT8	NIT	0.89888	90	0.868523	15	0.966227	1
NIT8d	NIT8	NIT	0.89888	90	1.01181	15	1.12563	0.0269626
NIT8e	NIT8	NIT	0.89888	90	1.00586	15	1.11902	0.00278318
NIT8f	NIT8	NIT	0.89888	90	0.984787	15	1.09557	0.129867
TET3a	TET3	TET	0.951959	90	1.09893	15	1.15439	5.67e-06
TET3b	TET3	TET	0.951959	90	1.23605	15	1.29843	8.13e-09
TET3c	TET3	TET	0.951959	90	1.27699	15	1.34143	7.87e-09
TET3d	TET3	TET	0.951959	90	1.30331	15	1.36908	7.87e-09
TET3e	TET3	TET	0.951959	90	1.32046	15	1.3871	7.87e-09
TET3f	TET3	TET	0.951959	90	1.24126	15	1.3039	8.13e-09
TET8a	TET8	TET	0.901619	90	1.20389	15	1.33525	8.27e-08
TET8b	TET8	TET	0.901619	90	1.2045	15	1.33593	1.24e-08
TET8c	TET8	TET	0.901619	90	1.1709	15	1.29866	8.27e-08
TET8d	TET8	TET	0.901619	90	1.07544	15	1.19278	9.99e-05
TET8e	TET8	TET	0.901619	90	1.09211	15	1.21128	8.8e-06
TET8f	TET8	TET	0.901619	90	1.18628	15	1.31572	3.67e-08
TOB10a	TOB10	TOB	0.815705	90	0.843362	15	1.03391	0.360856
TOB10b	TOB10	TOB	0.815705	90	0.865845	15	1.06147	0.000431962
TOB10c	TOB10	TOB	0.815705	90	0.878629	15	1.07714	0.00194601
TOB10d	TOB10	TOB	0.815705	90	0.859897	15	1.05418	0.0691276
TOB10e	TOB10	TOB	0.815705	90	0.906992	15	1.11191	0.000367983
TOB10f	TOB10	TOB	0.815705	90	1.12534	15	1.37959	7.87e-09
TOB4a	TOB4	TOB	0.598477	90	0.54255	15	0.906551	1
TOB4b	TOB4	TOB	0.598477	90	0.533847	15	0.892009	1
TOB4c	TOB4	TOB	0.598477	90	0.563064	15	0.940829	1
TOB4d	TOB4	TOB	0.598477	90	0.694536	15	1.16051	0.00310573
TOB4e	TOB4	TOB	0.598477	90	0.604005	15	1.00924	0.468143
TOB4f	TOB4	TOB	0.598477	90	0.616878	15	1.03075	0.355644
TOB8a	TOB8	TOB	0.631853	90	0.721793	15	1.14234	0.0115206
TOB8b	TOB8	TOB	0.631853	90	0.5738	15	0.908123	1
TOB8c	TOB8	TOB	0.631853	90	0.783502	15	1.24001	0.000301879
TOB8d	TOB8	TOB	0.631853	90	0.565062	15	0.894294	1
TOB8e	TOB8	TOB	0.631853	90	0.717092	15	1.1349	0.00880969
TOB8f	TOB8	TOB	0.631853	90	0.684815	15	1.08382	0.0316644
TOB9a	TOB9	TOB	0.702503	90	0.673282	15	0.958404	1
TOB9b	TOB9	TOB	0.702503	90	0.680505	15	0.968686	1
TOB9c	TOB9	TOB	0.702503	90	0.690648	15	0.983124	1
TOB9d	TOB9	TOB	0.702503	90	0.816132	15	1.16175	0.00204183
TOB9e	TOB9	TOB	0.702503	90	0.834474	15	1.18786	6.49e-05
TOB9f	TOB9	TOB	0.702503	90	0.695396	15	0.989883	1
TMP10a	TMP10	TMP	0.948989	90	1.02594	15	1.08109	0.00598507
TMP10b	TMP10	TMP	0.948989	90	1.13172	15	1.19255	2.09e-06
TMP10c	TMP10	TMP	0.948989	90	0.896064	15	0.94423	1
TMP10d	TMP10	TMP	0.948989	90	0.930797	15	0.980831	1
TMP10e	TMP10	TMP	0.948989	90	0.912228	15	0.961263	1
TMP10f	TMP10	TMP	0.948989	90	0.818953	15	0.862974	1
TMP2a	TMP2	TMP	0.927676	90	0.882567	15	0.951374	1
TMP2b	TMP2	TMP	0.927676	90	1.03856	15	1.11953	0.000146615
TMP2c	TMP2	TMP	0.927676	90	0.953317	15	1.02764	0.350449
TMP2d	TMP2	TMP	0.927676	90	0.955865	15	1.03039	0.0768799
TMP2e	TMP2	TMP	0.927676	90	0.974785	15	1.05078	0.056619
TMP2f	TMP2	TMP	0.927676	90	0.81281	15	0.876179	1
TMP7a	TMP7	TMP	0.968005	90	1.01001	15	1.04339	0.0505997
TMP7b	TMP7	TMP	0.968005	90	1.0475	15	1.08212	0.0012238
TMP7c	TMP7	TMP	0.968005	90	0.889051	15	0.918436	1
TMP7d	TMP7	TMP	0.968005	90	0.845489	15	0.873434	1
TMP7e	TMP7	TMP	0.968005	90	0.916506	15	0.946799	1
TMP7f	TMP7	TMP	0.968005	90	1.00745	15	1.04074	0.187979
TMP9a	TMP9	TMP	0.937128	90	1.13961	15	1.21607	4.85e-08
TMP9b	TMP9	TMP	0.937128	90	1.00377	15	1.07112	0.0106309
TMP9c	TMP9	TMP	0.937128	90	1.10988	15	1.18434	1.9e-05
TMP9d	TMP9	TMP	0.937128	90	0.940537	15	1.00364	0.513031
TMP9e	TMP9	TMP	0.937128	90	0.988524	15	1.05484	0.0279199
TMP9f	TMP9	TMP	0.937128	90	1.03431	15	1.1037	0.00483261

## Sheet: Significant improvement
T60 line	Corresponding T0 strain	Antibiotic adapted to	Fitness at T0	Number of points at T0	Fitness at T60	Number of points at T60	Relative fitness	Significance of fitness improvement (P-value)
AMP8e	AMP8	AMP	0.970413	90	1.05853	15	1.0908	0.0104827
CHL2b	CHL2	CHL	0.908178	90	0.973349	15	1.07176	0.000921559
CHL2f	CHL2	CHL	0.908178	90	1.01485	15	1.11746	8.77e-07
CIP5a	CIP5	CIP	0.677573	90	0.907158	15	1.33883	8.27e-08
CIP5b	CIP5	CIP	0.677573	90	0.869398	15	1.28311	3.01e-05
CIP5c	CIP5	CIP	0.677573	90	1.21017	15	1.78603	7.87e-09
CIP5d	CIP5	CIP	0.677573	90	1.01856	15	1.50325	4.52e-08
CIP5e	CIP5	CIP	0.677573	90	0.753306	15	1.11177	0.00112634
CIP5f	CIP5	CIP	0.677573	90	1.05501	15	1.55705	7.94e-09
CIP9a	CIP9	CIP	0.81324	90	1.17299	15	1.44236	7.87e-09
CIP9b	CIP9	CIP	0.81324	90	0.936726	15	1.15184	0.00282936
CIP9f	CIP9	CIP	0.81324	90	0.954924	15	1.17422	0.000581366
DOX3a	DOX3	DOX	0.967221	90	1.21098	15	1.25202	1.16e-08
DOX3b	DOX3	DOX	0.967221	90	1.32158	15	1.36637	7.87e-09
DOX3c	DOX3	DOX	0.967221	90	1.24468	15	1.28686	1.06e-08
DOX3d	DOX3	DOX	0.967221	90	1.13227	15	1.17064	1.7e-06
DOX3e	DOX3	DOX	0.967221	90	1.17899	15	1.21894	1.16e-08
FOX8a	FOX8	FOX	0.928476	90	1.04784	15	1.12856	2.61e-05
FOX8b	FOX8	FOX	0.928476	90	1.19305	15	1.28495	4.52e-08
FOX8c	FOX8	FOX	0.928476	90	0.995572	15	1.07227	0.0183906
FOX8e	FOX8	FOX	0.928476	90	1.01632	15	1.09461	0.00112634
FOX8f	FOX8	FOX	0.928476	90	1.06668	15	1.14885	0.000634216
KAN1a	KAN1	KAN	0.778765	90	0.891493	15	1.14475	0.000118881
KAN1b	KAN1	KAN	0.778765	90	0.942829	15	1.21067	7.56e-06
KAN1c	KAN1	KAN	0.778765	90	0.988639	15	1.2695	3.88e-06
KAN1d	KAN1	KAN	0.778765	90	1.14752	15	1.47351	1.16e-08
KAN1e	KAN1	KAN	0.778765	90	1.02872	15	1.32097	4.37e-08
KAN1f	KAN1	KAN	0.778765	90	0.987856	15	1.26849	5.83e-07
KAN4a	KAN4	KAN	0.611048	90	0.696295	15	1.13951	1.44e-06
KAN4b	KAN4	KAN	0.611048	90	0.858643	15	1.4052	2.76e-08
KAN4c	KAN4	KAN	0.611048	90	0.71032	15	1.16246	9.42e-05
KAN4d	KAN4	KAN	0.611048	90	0.665152	15	1.08854	0.000646013
KAN4e	KAN4	KAN	0.611048	90	0.717439	15	1.17411	5.18e-07
KAN4f	KAN4	KAN	0.611048	90	0.683334	15	1.1183	0.000225186
KAN8a	KAN8	KAN	0.6366	90	0.873411	15	1.37199	0.000247014
NIT8a	NIT8	NIT	0.89888	90	0.939225	15	1.04488	0.0115206
NIT8b	NIT8	NIT	0.89888	90	1.21583	15	1.35261	1.16e-08
NIT8d	NIT8	NIT	0.89888	90	1.01181	15	1.12563	0.0269626
NIT8e	NIT8	NIT	0.89888	90	1.00586	15	1.11902	0.00278318
TET3a	TET3	TET	0.951959	90	1.09893	15	1.15439	5.67e-06
TET3b	TET3	TET	0.951959	90	1.23605	15	1.29843	8.13e-09
TET3c	TET3	TET	0.951959	90	1.27699	15	1.34143	7.87e-09
TET3d	TET3	TET	0.951959	90	1.30331	15	1.36908	7.87e-09
TET3e	TET3	TET	0.951959	90	1.32046	15	1.3871	7.87e-09
TET3f	TET3	TET	0.951959	90	1.24126	15	1.3039	8.13e-09
TET8a	TET8	TET	0.901619	90	1.20389	15	1.33525	8.27e-08
TET8b	TET8	TET	0.901619	90	1.2045	15	1.33593	1.24e-08
TET8c	TET8	TET	0.901619	90	1.1709	15	1.29866	8.27e-08
TET8d	TET8	TET	0.901619	90	1.07544	15	1.19278	9.99e-05
TET8e	TET8	TET	0.901619	90	1.09211	15	1.21128	8.8e-06
TET8f	TET8	TET	0.901619	90	1.18628	15	1.31572	3.67e-08
TOB10b	TOB10	TOB	0.815705	90	0.865845	15	1.06147	0.000431962
TOB10c	TOB10	TOB	0.815705	90	0.878629	15	1.07714	0.00194601
TOB10e	TOB10	TOB	0.815705	90	0.906992	15	1.11191	0.000367983
TOB10f	TOB10	TOB	0.815705	90	1.12534	15	1.37959	7.87e-09
TOB4d	TOB4	TOB	0.598477	90	0.694536	15	1.16051	0.00310573
TOB8a	TOB8	TOB	0.631853	90	0.721793	15	1.14234	0.0115206
TOB8c	TOB8	TOB	0.631853	90	0.783502	15	1.24001	0.000301879
TOB8e	TOB8	TOB	0.631853	90	0.717092	15	1.1349	0.00880969
TOB8f	TOB8	TOB	0.631853	90	0.684815	15	1.08382	0.0316644
TOB9d	TOB9	TOB	0.702503	90	0.816132	15	1.16175	0.00204183
TOB9e	TOB9	TOB	0.702503	90	0.834474	15	1.18786	6.49e-05
TMP10a	TMP10	TMP	0.948989	90	1.02594	15	1.08109	0.00598507
TMP10b	TMP10	TMP	0.948989	90	1.13172	15	1.19255	2.09e-06
TMP2b	TMP2	TMP	0.927676	90	1.03856	15	1.11953	0.000146615
TMP7b	TMP7	TMP	0.968005	90	1.0475	15	1.08212	0.0012238
TMP9a	TMP9	TMP	0.937128	90	1.13961	15	1.21607	4.85e-08
TMP9b	TMP9	TMP	0.937128	90	1.00377	15	1.07112	0.0106309
TMP9c	TMP9	TMP	0.937128	90	1.10988	15	1.18434	1.9e-05
TMP9e	TMP9	TMP	0.937128	90	0.988524	15	1.05484	0.0279199
TMP9f	TMP9	TMP	0.937128	90	1.03431	15	1.1037	0.00483261
