# Supplementary material for: Rapid decline of bacterial drug-resistance in an antibiotic-free environment through phenotypic reversion
Source: eLife journal article supplement (doi:10.7554/elife.47088), 2019-08-16
Supplement: supp [file elife-47088-supp-v1.zip › elife_poa_e47088_Figure_4_source_data_1.xlsx]

## Sheet: Description
Figure 4-source data – Fitness recovery and resistance loss after compensatory evolution.
Sheet 'CLSI breakpoints'	This spreadsheet contains the minimum inhibitory concentrations (MICs) recommended by the Clinical and Laboratory Standards Institute (CLSI) as breakpoints for antibiotic resistance and sensitivity.
Sheet 'resistance_fitness_dataset'	This spreadsheet contains various measures (resistance and fitness) for all 71 T60 line showing significant fitness improvement towards all antibiotics to which the original T0 strain exhibited resistance
	T0 line	The name of the resistant strain derived from a previous study (Lázár et al, 2014)
	Antibiotic the T0 line evolved to	The abbreviation of the antibiotic the reistant strains were originally adapted to
	T60 line	The name of the compensatory evolved line
	Antibiotic tested to	The abbreviation of the antibiotic the T0 and T60 strains were tested to
	Antibiotic name	The name of the antibiotic the T0 and T60 strains were tested to
	Antibiotic class	The class of the antibiotic the T0 and T60 strains were tested to
	Molecular target	The molecular target of the antibiotic the T0 and T60 strains were tested to
	Effect	The effect of the antibiotic the T0 and T60 strains were tested to
	MIC for WT (µg/ml)	Minimum inhibitory concentration for the antibiotic tested in wild type
	MIC for T0 (µg/ml)	Minimum inhibitory concentration for the antibiotic tested in T0
	CSLI category for T0	Category of the T0 strain according to the CSLI breakpoints	resistant (MIC is greater than or equal to the CLSI breakpoint for resistance)
			intermediate (MIC is between the CLSI breakpoints for resistance and sensitivity)
			sensitive (MIC is less than or equal to the CLSI breakpoint for sensitivity)
	MIC for T60 (µg/ml)	Minimum inhibitory concentration for the antibiotic tested in T60
	CSLI category for T60	Category of the T0 strain according to the CSLI breakpoints	resistant (MIC is greater than or equal to the CLSI breakpoint for resistance)
			intermediate (MIC is between the CLSI breakpoints for resistance and sensitivity)
			sensitive (MIC is less than or equal to the CLSI breakpoint for sensitivity)
	Relative MIC fold-change	MIC change in T60 relative to T0
	Resistance change	Change of resistance during compensatory evolution	intermediate_to_intermediate
			lintermediate_to_sensitive
			resistant_to_intermediate
			resistant_to_resistant
			resistant_to_sensitive
	Maintenance of resistance	Change of resistance against a particular antibiotic in T60 compare to that of T0	maintained (resistant to resistant or intermediate to intermediate)
			lost (resistant to sensitive, resistant to intermediate or intermediate to sensitive)
	Own antibiotic	Is the tested antibiotic the same as the corresponding line was originally adapted to? (yes, no)
	Relative fitness	Fitness improvement of the T60 line relative to the corresponding T0 line
	Proportion of resistance loss	Relative proportion of resistance loss for each antibiotic tested per evolved line
	Change of resistance profile	Change of resistance profile in T60 compare to that of T0	complete loss was defined as an MIC decrease below the CLSI clinical breakpoint for sensitivity towards all tested antibiotics (proportion of resistance loss is 1)
			partial loss was defined as an MIC decrease below the CLSI clinical breakpoint for sensitivity towards at least one antibiotic (proportion of resistance loss is between 0 and 1)
			no loss was defined as MIC maintained above the CLSI clinical breakpoint for resistance towards all tested antibiotics (proportion of resistance loss is 0)

## Sheet: CLSI breakpoints
Antibiotics	Abbreviations for antibiotics	Breakpoint for sensitivity (below µg/ml MIC)	Breakpoint for resistance (over µg/ml MIC)
ampicillin	AMP	8	32
chloramphenicol	CHL	8	32
ciprofloxacin	CIP	1	4
doxycycline	DOX	4	16
cefoxitin	FOX	8	32
kanamycin	KAN	16	64
nitrofurantoin	NIT	32	128
tetracycline	TET	4	16
tobramycin	TOB	4	16
trimethoprim	TMP	8	16
nalidixic acid	NAL	16	32

## Sheet: resistance_fitness_dataset
T0 line	Antibiotic the T0 line evolved to	T60 line	Antibiotic tested to	Antibiotic name	Antibiotic class	Molecular target	Effect	MIC for WT (µg/ml)	MIC for T0 (µg/ml)	CSLI category for T0	MIC for T60 (µg/ml)	CSLI category for T60	Relative MIC fold-change	Resistance change	Maintenance of resistance	Own antibiotic	Relative fitness	Proportion of resistance loss	Change of resistance profile
AMP8	AMP	AMP8e	AMP	Ampicillin	Penicillin	Cell wall	Bactericidal	2	48	resistant	3	sensitive	0.0625	resistant_to_sensitive	lost	yes	1.0908	1	complete loss
CHL2	CHL	CHL2b	CHL	Chloramphenicol	Chloramphenicol	Protein synthesis, 50S	Bacteriostatic	3	256	resistant	256	resistant	1	resistant_to_resistant	maintained	yes	1.07176	0.25	partial loss
CHL2	CHL	CHL2b	TET	Tetracycline	Tetra-cyclines	Protein synthesis, 30S	Bacteriostatic	0.5	12	intermediate	8	intermediate	0.666667	intermediate_to_intermediate	maintained	no	1.07176	0.25	partial loss
CHL2	CHL	CHL2b	NAL	Nalidixic acid	Quinolones	Gyrase	Bactericidal	3	32	resistant	16	sensitive	0.5	resistant_to_sensitive	lost	no	1.07176	0.25	partial loss
CHL2	CHL	CHL2b	FOX	Cefoxitin	Chephalosporins	Cell wall	Bactericidal	4	256	resistant	256	resistant	1	resistant_to_resistant	maintained	no	1.07176	0.25	partial loss
CHL2	CHL	CHL2f	CHL	Chloramphenicol	Chloramphenicol	Protein synthesis, 50S	Bacteriostatic	3	256	resistant	256	resistant	1	resistant_to_resistant	maintained	yes	1.11746	0.25	partial loss
CHL2	CHL	CHL2f	TET	Tetracycline	Tetra-cyclines	Protein synthesis, 30S	Bacteriostatic	0.5	8	intermediate	8	intermediate	1	intermediate_to_intermediate	maintained	no	1.11746	0.25	partial loss
CHL2	CHL	CHL2f	NAL	Nalidixic acid	Quinolones	Gyrase	Bactericidal	3	32	resistant	16	sensitive	0.5	resistant_to_sensitive	lost	no	1.11746	0.25	partial loss
CHL2	CHL	CHL2f	FOX	Cefoxitin	Chephalosporins	Cell wall	Bactericidal	4	256	resistant	256	resistant	1	resistant_to_resistant	maintained	no	1.11746	0.25	partial loss
CIP5	CIP	CIP5a	CIP	Ciprofloxacin	Quinolones	Gyrase	Bactericidal	0.016	12	resistant	2	intermediate	0.166667	resistant_to_intermediate	lost	yes	1.33883	0.5	partial loss
CIP5	CIP	CIP5a	NAL	Nalidixic acid	Quinolones	Gyrase	Bactericidal	3	256	resistant	256	resistant	1	resistant_to_resistant	maintained	no	1.33883	0.5	partial loss
CIP5	CIP	CIP5b	CIP	Ciprofloxacin	Quinolones	Gyrase	Bactericidal	0.016	12	resistant	2	intermediate	0.166667	resistant_to_intermediate	lost	yes	1.28311	0.5	partial loss
CIP5	CIP	CIP5b	NAL	Nalidixic acid	Quinolones	Gyrase	Bactericidal	3	256	resistant	96	resistant	0.375	resistant_to_resistant	maintained	no	1.28311	0.5	partial loss
CIP5	CIP	CIP5c	CIP	Ciprofloxacin	Quinolones	Gyrase	Bactericidal	0.016	12	resistant	2	intermediate	0.166667	resistant_to_intermediate	lost	yes	1.78603	0.5	partial loss
CIP5	CIP	CIP5c	NAL	Nalidixic acid	Quinolones	Gyrase	Bactericidal	3	256	resistant	256	resistant	1	resistant_to_resistant	maintained	no	1.78603	0.5	partial loss
CIP5	CIP	CIP5d	CIP	Ciprofloxacin	Quinolones	Gyrase	Bactericidal	0.016	12	resistant	2	intermediate	0.166667	resistant_to_intermediate	lost	yes	1.50325	0.5	partial loss
CIP5	CIP	CIP5d	NAL	Nalidixic acid	Quinolones	Gyrase	Bactericidal	3	256	resistant	256	resistant	1	resistant_to_resistant	maintained	no	1.50325	0.5	partial loss
CIP5	CIP	CIP5e	CIP	Ciprofloxacin	Quinolones	Gyrase	Bactericidal	0.016	12	resistant	2	intermediate	0.166667	resistant_to_intermediate	lost	yes	1.11177	0.5	partial loss
CIP5	CIP	CIP5e	NAL	Nalidixic acid	Quinolones	Gyrase	Bactericidal	3	256	resistant	256	resistant	1	resistant_to_resistant	maintained	no	1.11177	0.5	partial loss
CIP5	CIP	CIP5f	CIP	Ciprofloxacin	Quinolones	Gyrase	Bactericidal	0.016	12	resistant	2	intermediate	0.166667	resistant_to_intermediate	lost	yes	1.55705	0.5	partial loss
CIP5	CIP	CIP5f	NAL	Nalidixic acid	Quinolones	Gyrase	Bactericidal	3	256	resistant	256	resistant	1	resistant_to_resistant	maintained	no	1.55705	0.5	partial loss
CIP9	CIP	CIP9a	CIP	Ciprofloxacin	Quinolones	Gyrase	Bactericidal	0.016	3	intermediate	3	intermediate	1	intermediate_to_intermediate	maintained	yes	1.44236	0	no loss
CIP9	CIP	CIP9a	NAL	Nalidixic acid	Quinolones	Gyrase	Bactericidal	3	256	resistant	256	resistant	1	resistant_to_resistant	maintained	no	1.44236	0	no loss
CIP9	CIP	CIP9a	AMP	Ampicillin	Penicillin	Cell wall	Bactericidal	2	32	resistant	32	resistant	1	resistant_to_resistant	maintained	no	1.44236	0	no loss
CIP9	CIP	CIP9a	FOX	Cefoxitin	Chephalosporins	Cell wall	Bactericidal	4	256	resistant	256	resistant	1	resistant_to_resistant	maintained	no	1.44236	0	no loss
CIP9	CIP	CIP9b	CIP	Ciprofloxacin	Quinolones	Gyrase	Bactericidal	0.016	3	intermediate	3	intermediate	1	intermediate_to_intermediate	maintained	yes	1.15184	0	no loss
CIP9	CIP	CIP9b	NAL	Nalidixic acid	Quinolones	Gyrase	Bactericidal	3	256	resistant	128	resistant	0.5	resistant_to_resistant	maintained	no	1.15184	0	no loss
CIP9	CIP	CIP9b	AMP	Ampicillin	Penicillin	Cell wall	Bactericidal	2	32	resistant	48	resistant	1.5	resistant_to_resistant	maintained	no	1.15184	0	no loss
CIP9	CIP	CIP9b	FOX	Cefoxitin	Chephalosporins	Cell wall	Bactericidal	4	256	resistant	128	resistant	0.5	resistant_to_resistant	maintained	no	1.15184	0	no loss
CIP9	CIP	CIP9f	CIP	Ciprofloxacin	Quinolones	Gyrase	Bactericidal	0.016	3	intermediate	3	intermediate	1	intermediate_to_intermediate	maintained	yes	1.17422	0	no loss
CIP9	CIP	CIP9f	NAL	Nalidixic acid	Quinolones	Gyrase	Bactericidal	3	256	resistant	64	resistant	0.25	resistant_to_resistant	maintained	no	1.17422	0	no loss
CIP9	CIP	CIP9f	AMP	Ampicillin	Penicillin	Cell wall	Bactericidal	2	32	resistant	48	resistant	1.5	resistant_to_resistant	maintained	no	1.17422	0	no loss
CIP9	CIP	CIP9f	FOX	Cefoxitin	Chephalosporins	Cell wall	Bactericidal	4	256	resistant	64	resistant	0.25	resistant_to_resistant	maintained	no	1.17422	0	no loss
DOX3	DOX	DOX3a	DOX	Doxycycline	Tetra-cyclines	Protein synthesis, 30S	Bacteriostatic	0.75	24	resistant	2	sensitive	0.0833333	resistant_to_sensitive	lost	yes	1.25202	1	complete loss
DOX3	DOX	DOX3a	TET	Tetracycline	Tetra-cyclines	Protein synthesis, 30S	Bacteriostatic	0.5	8	intermediate	0.5	sensitive	0.0625	lintermediate_to_sensitive	lost	no	1.25202	1	complete loss
DOX3	DOX	DOX3a	CHL	Chloramphenicol	Chloramphenicol	Protein synthesis, 50S	Bacteriostatic	3	96	resistant	6	sensitive	0.0625	resistant_to_sensitive	lost	no	1.25202	1	complete loss
DOX3	DOX	DOX3a	AMP	Ampicillin	Penicillin	Cell wall	Bactericidal	2	24	intermediate	3	sensitive	0.125	lintermediate_to_sensitive	lost	no	1.25202	1	complete loss
DOX3	DOX	DOX3a	NAL	Nalidixic acid	Quinolones	Gyrase	Bactericidal	3	24	intermediate	3	sensitive	0.125	lintermediate_to_sensitive	lost	no	1.25202	1	complete loss
DOX3	DOX	DOX3a	FOX	Cefoxitin	Chephalosporins	Cell wall	Bactericidal	4	96	resistant	16	intermediate	0.166667	resistant_to_intermediate	lost	no	1.25202	1	complete loss
DOX3	DOX	DOX3b	DOX	Doxycycline	Tetra-cyclines	Protein synthesis, 30S	Bacteriostatic	0.75	24	resistant	1.5	sensitive	0.0625	resistant_to_sensitive	lost	yes	1.36637	1	complete loss
DOX3	DOX	DOX3b	TET	Tetracycline	Tetra-cyclines	Protein synthesis, 30S	Bacteriostatic	0.5	8	intermediate	0.5	sensitive	0.0625	lintermediate_to_sensitive	lost	no	1.36637	1	complete loss
DOX3	DOX	DOX3b	CHL	Chloramphenicol	Chloramphenicol	Protein synthesis, 50S	Bacteriostatic	3	96	resistant	6	sensitive	0.0625	resistant_to_sensitive	lost	no	1.36637	1	complete loss
DOX3	DOX	DOX3b	AMP	Ampicillin	Penicillin	Cell wall	Bactericidal	2	24	intermediate	4	sensitive	0.166667	lintermediate_to_sensitive	lost	no	1.36637	1	complete loss
DOX3	DOX	DOX3b	NAL	Nalidixic acid	Quinolones	Gyrase	Bactericidal	3	24	intermediate	2	sensitive	0.0833333	lintermediate_to_sensitive	lost	no	1.36637	1	complete loss
DOX3	DOX	DOX3b	FOX	Cefoxitin	Chephalosporins	Cell wall	Bactericidal	4	96	resistant	8	sensitive	0.0833333	resistant_to_sensitive	lost	no	1.36637	1	complete loss
DOX3	DOX	DOX3c	DOX	Doxycycline	Tetra-cyclines	Protein synthesis, 30S	Bacteriostatic	0.75	24	resistant	16	resistant	0.666667	resistant_to_resistant	maintained	yes	1.28686	0.166667	partial loss
DOX3	DOX	DOX3c	TET	Tetracycline	Tetra-cyclines	Protein synthesis, 30S	Bacteriostatic	0.5	8	intermediate	8	intermediate	1	intermediate_to_intermediate	maintained	no	1.28686	0.166667	partial loss
DOX3	DOX	DOX3c	CHL	Chloramphenicol	Chloramphenicol	Protein synthesis, 50S	Bacteriostatic	3	96	resistant	96	resistant	1	resistant_to_resistant	maintained	no	1.28686	0.166667	partial loss
DOX3	DOX	DOX3c	AMP	Ampicillin	Penicillin	Cell wall	Bactericidal	2	24	intermediate	24	intermediate	1	intermediate_to_intermediate	maintained	no	1.28686	0.166667	partial loss
DOX3	DOX	DOX3c	NAL	Nalidixic acid	Quinolones	Gyrase	Bactericidal	3	24	intermediate	16	sensitive	0.666667	lintermediate_to_sensitive	lost	no	1.28686	0.166667	partial loss
DOX3	DOX	DOX3c	FOX	Cefoxitin	Chephalosporins	Cell wall	Bactericidal	4	96	resistant	32	resistant	0.333333	resistant_to_resistant	maintained	no	1.28686	0.166667	partial loss
DOX3	DOX	DOX3d	DOX	Doxycycline	Tetra-cyclines	Protein synthesis, 30S	Bacteriostatic	0.75	24	resistant	1	sensitive	0.0416667	resistant_to_sensitive	lost	yes	1.17064	1	complete loss
DOX3	DOX	DOX3d	TET	Tetracycline	Tetra-cyclines	Protein synthesis, 30S	Bacteriostatic	0.5	8	intermediate	1.5	sensitive	0.1875	lintermediate_to_sensitive	lost	no	1.17064	1	complete loss
DOX3	DOX	DOX3d	CHL	Chloramphenicol	Chloramphenicol	Protein synthesis, 50S	Bacteriostatic	3	96	resistant	8	sensitive	0.0833333	resistant_to_sensitive	lost	no	1.17064	1	complete loss
DOX3	DOX	DOX3d	AMP	Ampicillin	Penicillin	Cell wall	Bactericidal	2	24	intermediate	3	sensitive	0.125	lintermediate_to_sensitive	lost	no	1.17064	1	complete loss
DOX3	DOX	DOX3d	NAL	Nalidixic acid	Quinolones	Gyrase	Bactericidal	3	24	intermediate	2	sensitive	0.0833333	lintermediate_to_sensitive	lost	no	1.17064	1	complete loss
DOX3	DOX	DOX3d	FOX	Cefoxitin	Chephalosporins	Cell wall	Bactericidal	4	96	resistant	8	sensitive	0.0833333	resistant_to_sensitive	lost	no	1.17064	1	complete loss
DOX3	DOX	DOX3e	DOX	Doxycycline	Tetra-cyclines	Protein synthesis, 30S	Bacteriostatic	0.75	24	resistant	3	sensitive	0.125	resistant_to_sensitive	lost	yes	1.21894	1	complete loss
DOX3	DOX	DOX3e	TET	Tetracycline	Tetra-cyclines	Protein synthesis, 30S	Bacteriostatic	0.5	8	intermediate	1.5	sensitive	0.1875	lintermediate_to_sensitive	lost	no	1.21894	1	complete loss
DOX3	DOX	DOX3e	CHL	Chloramphenicol	Chloramphenicol	Protein synthesis, 50S	Bacteriostatic	3	96	resistant	8	sensitive	0.0833333	resistant_to_sensitive	lost	no	1.21894	1	complete loss
DOX3	DOX	DOX3e	AMP	Ampicillin	Penicillin	Cell wall	Bactericidal	2	24	intermediate	3	sensitive	0.125	lintermediate_to_sensitive	lost	no	1.21894	1	complete loss
DOX3	DOX	DOX3e	NAL	Nalidixic acid	Quinolones	Gyrase	Bactericidal	3	24	intermediate	2	sensitive	0.0833333	lintermediate_to_sensitive	lost	no	1.21894	1	complete loss
DOX3	DOX	DOX3e	FOX	Cefoxitin	Chephalosporins	Cell wall	Bactericidal	4	96	resistant	16	intermediate	0.166667	resistant_to_intermediate	lost	no	1.21894	1	complete loss
FOX8	FOX	FOX8a	FOX	Cefoxitin	Chephalosporins	Cell wall	Bactericidal	4	256	resistant	256	resistant	1	resistant_to_resistant	maintained	yes	1.12856	0.5	partial loss
FOX8	FOX	FOX8a	AMP	Ampicillin	Penicillin	Cell wall	Bactericidal	2	48	resistant	24	intermediate	0.5	resistant_to_intermediate	lost	no	1.12856	0.5	partial loss
FOX8	FOX	FOX8b	FOX	Cefoxitin	Chephalosporins	Cell wall	Bactericidal	4	256	resistant	256	resistant	1	resistant_to_resistant	maintained	yes	1.28495	0.5	partial loss
FOX8	FOX	FOX8b	AMP	Ampicillin	Penicillin	Cell wall	Bactericidal	2	48	resistant	24	intermediate	0.5	resistant_to_intermediate	lost	no	1.28495	0.5	partial loss
FOX8	FOX	FOX8c	FOX	Cefoxitin	Chephalosporins	Cell wall	Bactericidal	4	256	resistant	192	resistant	0.75	resistant_to_resistant	maintained	yes	1.07227	0	no loss
FOX8	FOX	FOX8c	AMP	Ampicillin	Penicillin	Cell wall	Bactericidal	2	48	resistant	32	resistant	0.666667	resistant_to_resistant	maintained	no	1.07227	0	no loss
FOX8	FOX	FOX8e	FOX	Cefoxitin	Chephalosporins	Cell wall	Bactericidal	4	256	resistant	96	resistant	0.375	resistant_to_resistant	maintained	yes	1.09461	0	no loss
FOX8	FOX	FOX8e	AMP	Ampicillin	Penicillin	Cell wall	Bactericidal	2	48	resistant	48	resistant	1	resistant_to_resistant	maintained	no	1.09461	0	no loss
FOX8	FOX	FOX8f	FOX	Cefoxitin	Chephalosporins	Cell wall	Bactericidal	4	256	resistant	96	resistant	0.375	resistant_to_resistant	maintained	yes	1.14885	0.5	partial loss
FOX8	FOX	FOX8f	AMP	Ampicillin	Penicillin	Cell wall	Bactericidal	2	48	resistant	24	intermediate	0.5	resistant_to_intermediate	lost	no	1.14885	0.5	partial loss
KAN1	KAN	KAN1a	KAN	Kanamycin	Aminoglycosides	Protein synthesis, 30S	Bactericidal	2	256	resistant	256	resistant	1	resistant_to_resistant	maintained	yes	1.14475	0	no loss
KAN1	KAN	KAN1b	KAN	Kanamycin	Aminoglycosides	Protein synthesis, 30S	Bactericidal	2	256	resistant	256	resistant	1	resistant_to_resistant	maintained	yes	1.21067	0	no loss
KAN1	KAN	KAN1c	KAN	Kanamycin	Aminoglycosides	Protein synthesis, 30S	Bactericidal	2	256	resistant	256	resistant	1	resistant_to_resistant	maintained	yes	1.2695	0	no loss
KAN1	KAN	KAN1d	KAN	Kanamycin	Aminoglycosides	Protein synthesis, 30S	Bactericidal	2	256	resistant	256	resistant	1	resistant_to_resistant	maintained	yes	1.47351	0	no loss
KAN1	KAN	KAN1e	KAN	Kanamycin	Aminoglycosides	Protein synthesis, 30S	Bactericidal	2	256	resistant	256	resistant	1	resistant_to_resistant	maintained	yes	1.32097	0	no loss
KAN1	KAN	KAN1f	KAN	Kanamycin	Aminoglycosides	Protein synthesis, 30S	Bactericidal	2	256	resistant	256	resistant	1	resistant_to_resistant	maintained	yes	1.26849	0	no loss
KAN4	KAN	KAN4a	KAN	Kanamycin	Aminoglycosides	Protein synthesis, 30S	Bactericidal	2	256	resistant	256	resistant	1	resistant_to_resistant	maintained	yes	1.13951	0	no loss
KAN4	KAN	KAN4a	TOB	Tobramycin	Aminoglycosides	Protein synthesis, 30S	Bactericidal	0.38	256	resistant	64	resistant	0.25	resistant_to_resistant	maintained	no	1.13951	0	no loss
KAN4	KAN	KAN4b	KAN	Kanamycin	Aminoglycosides	Protein synthesis, 30S	Bactericidal	2	256	resistant	256	resistant	1	resistant_to_resistant	maintained	yes	1.4052	0	no loss
KAN4	KAN	KAN4b	TOB	Tobramycin	Aminoglycosides	Protein synthesis, 30S	Bactericidal	0.38	256	resistant	16	resistant	0.0625	resistant_to_resistant	maintained	no	1.4052	0	no loss
KAN4	KAN	KAN4c	KAN	Kanamycin	Aminoglycosides	Protein synthesis, 30S	Bactericidal	2	256	resistant	256	resistant	1	resistant_to_resistant	maintained	yes	1.16246	0	no loss
KAN4	KAN	KAN4c	TOB	Tobramycin	Aminoglycosides	Protein synthesis, 30S	Bactericidal	0.38	256	resistant	64	resistant	0.25	resistant_to_resistant	maintained	no	1.16246	0	no loss
KAN4	KAN	KAN4d	KAN	Kanamycin	Aminoglycosides	Protein synthesis, 30S	Bactericidal	2	256	resistant	256	resistant	1	resistant_to_resistant	maintained	yes	1.08854	0	no loss
KAN4	KAN	KAN4d	TOB	Tobramycin	Aminoglycosides	Protein synthesis, 30S	Bactericidal	0.38	256	resistant	32	resistant	0.125	resistant_to_resistant	maintained	no	1.08854	0	no loss
KAN4	KAN	KAN4e	KAN	Kanamycin	Aminoglycosides	Protein synthesis, 30S	Bactericidal	2	256	resistant	256	resistant	1	resistant_to_resistant	maintained	yes	1.17411	0.5	partial loss
KAN4	KAN	KAN4e	TOB	Tobramycin	Aminoglycosides	Protein synthesis, 30S	Bactericidal	0.38	256	resistant	6	intermediate	0.0234375	resistant_to_intermediate	lost	no	1.17411	0.5	partial loss
KAN4	KAN	KAN4f	KAN	Kanamycin	Aminoglycosides	Protein synthesis, 30S	Bactericidal	2	256	resistant	256	resistant	1	resistant_to_resistant	maintained	yes	1.1183	0.5	partial loss
KAN4	KAN	KAN4f	TOB	Tobramycin	Aminoglycosides	Protein synthesis, 30S	Bactericidal	0.38	256	resistant	6	intermediate	0.0234375	resistant_to_intermediate	lost	no	1.1183	0.5	partial loss
KAN8	KAN	KAN8a	KAN	Kanamycin	Aminoglycosides	Protein synthesis, 30S	Bactericidal	2	48	intermediate	8	sensitive	0.166667	lintermediate_to_sensitive	lost	yes	1.37199	1	complete loss
NIT8	NIT	NIT8a	NIT	Nitrofurantoin	Nitrofurantoin	Multiple mechanisms	Bactericidal	6	512	resistant	512	resistant	1	resistant_to_resistant	maintained	yes	1.04488	0.5	partial loss
NIT8	NIT	NIT8a	FOX	Cefoxitin	Chephalosporins	Cell wall	Bactericidal	4	24	intermediate	3	sensitive	0.125	lintermediate_to_sensitive	lost	no	1.04488	0.5	partial loss
NIT8	NIT	NIT8b	NIT	Nitrofurantoin	Nitrofurantoin	Multiple mechanisms	Bactericidal	6	512	resistant	512	resistant	1	resistant_to_resistant	maintained	yes	1.35261	0.5	partial loss
NIT8	NIT	NIT8b	FOX	Cefoxitin	Chephalosporins	Cell wall	Bactericidal	4	24	intermediate	3	sensitive	0.125	lintermediate_to_sensitive	lost	no	1.35261	0.5	partial loss
NIT8	NIT	NIT8d	NIT	Nitrofurantoin	Nitrofurantoin	Multiple mechanisms	Bactericidal	6	512	resistant	512	resistant	1	resistant_to_resistant	maintained	yes	1.12563	0.5	partial loss
NIT8	NIT	NIT8d	FOX	Cefoxitin	Chephalosporins	Cell wall	Bactericidal	4	24	intermediate	4	sensitive	0.166667	lintermediate_to_sensitive	lost	no	1.12563	0.5	partial loss
NIT8	NIT	NIT8e	NIT	Nitrofurantoin	Nitrofurantoin	Multiple mechanisms	Bactericidal	6	512	resistant	512	resistant	1	resistant_to_resistant	maintained	yes	1.11902	0.5	partial loss
NIT8	NIT	NIT8e	FOX	Cefoxitin	Chephalosporins	Cell wall	Bactericidal	4	24	intermediate	3	sensitive	0.125	lintermediate_to_sensitive	lost	no	1.11902	0.5	partial loss
TET3	TET	TET3a	TET	Tetracycline	Tetra-cyclines	Protein synthesis, 30S	Bacteriostatic	0.5	12	intermediate	0.5	sensitive	0.0416667	lintermediate_to_sensitive	lost	yes	1.15439	1	complete loss
TET3	TET	TET3a	DOX	Doxycycline	Tetra-cyclines	Protein synthesis, 30S	Bacteriostatic	0.75	6	intermediate	1.5	sensitive	0.25	lintermediate_to_sensitive	lost	no	1.15439	1	complete loss
TET3	TET	TET3a	FOX	Cefoxitin	Chephalosporins	Cell wall	Bactericidal	4	24	intermediate	8	sensitive	0.333333	lintermediate_to_sensitive	lost	no	1.15439	1	complete loss
TET3	TET	TET3b	TET	Tetracycline	Tetra-cyclines	Protein synthesis, 30S	Bacteriostatic	0.5	12	intermediate	0.5	sensitive	0.0416667	lintermediate_to_sensitive	lost	yes	1.29843	0.666667	partial loss
TET3	TET	TET3b	DOX	Doxycycline	Tetra-cyclines	Protein synthesis, 30S	Bacteriostatic	0.75	6	intermediate	3	sensitive	0.5	lintermediate_to_sensitive	lost	no	1.29843	0.666667	partial loss
TET3	TET	TET3b	FOX	Cefoxitin	Chephalosporins	Cell wall	Bactericidal	4	24	intermediate	12	intermediate	0.5	intermediate_to_intermediate	maintained	no	1.29843	0.666667	partial loss
TET3	TET	TET3c	TET	Tetracycline	Tetra-cyclines	Protein synthesis, 30S	Bacteriostatic	0.5	12	intermediate	0.5	sensitive	0.0416667	lintermediate_to_sensitive	lost	yes	1.34143	1	complete loss
TET3	TET	TET3c	DOX	Doxycycline	Tetra-cyclines	Protein synthesis, 30S	Bacteriostatic	0.75	6	intermediate	2	sensitive	0.333333	lintermediate_to_sensitive	lost	no	1.34143	1	complete loss
TET3	TET	TET3c	FOX	Cefoxitin	Chephalosporins	Cell wall	Bactericidal	4	24	intermediate	6	sensitive	0.25	lintermediate_to_sensitive	lost	no	1.34143	1	complete loss
TET3	TET	TET3d	TET	Tetracycline	Tetra-cyclines	Protein synthesis, 30S	Bacteriostatic	0.5	12	intermediate	0.75	sensitive	0.0625	lintermediate_to_sensitive	lost	yes	1.36908	1	complete loss
TET3	TET	TET3d	DOX	Doxycycline	Tetra-cyclines	Protein synthesis, 30S	Bacteriostatic	0.75	6	intermediate	1.5	sensitive	0.25	lintermediate_to_sensitive	lost	no	1.36908	1	complete loss
TET3	TET	TET3d	FOX	Cefoxitin	Chephalosporins	Cell wall	Bactericidal	4	24	intermediate	8	sensitive	0.333333	lintermediate_to_sensitive	lost	no	1.36908	1	complete loss
TET3	TET	TET3e	TET	Tetracycline	Tetra-cyclines	Protein synthesis, 30S	Bacteriostatic	0.5	12	intermediate	0.5	sensitive	0.0416667	lintermediate_to_sensitive	lost	yes	1.3871	1	complete loss
TET3	TET	TET3e	DOX	Doxycycline	Tetra-cyclines	Protein synthesis, 30S	Bacteriostatic	0.75	6	intermediate	1.5	sensitive	0.25	lintermediate_to_sensitive	lost	no	1.3871	1	complete loss
TET3	TET	TET3e	FOX	Cefoxitin	Chephalosporins	Cell wall	Bactericidal	4	24	intermediate	8	sensitive	0.333333	lintermediate_to_sensitive	lost	no	1.3871	1	complete loss
TET3	TET	TET3f	TET	Tetracycline	Tetra-cyclines	Protein synthesis, 30S	Bacteriostatic	0.5	12	intermediate	0.5	sensitive	0.0416667	lintermediate_to_sensitive	lost	yes	1.3039	1	complete loss
TET3	TET	TET3f	DOX	Doxycycline	Tetra-cyclines	Protein synthesis, 30S	Bacteriostatic	0.75	6	intermediate	1.5	sensitive	0.25	lintermediate_to_sensitive	lost	no	1.3039	1	complete loss
TET3	TET	TET3f	FOX	Cefoxitin	Chephalosporins	Cell wall	Bactericidal	4	24	intermediate	8	sensitive	0.333333	lintermediate_to_sensitive	lost	no	1.3039	1	complete loss
TET8	TET	TET8a	TET	Tetracycline	Tetra-cyclines	Protein synthesis, 30S	Bacteriostatic	0.5	8	intermediate	0.5	sensitive	0.0625	lintermediate_to_sensitive	lost	yes	1.33525	1	complete loss
TET8	TET	TET8a	DOX	Doxycycline	Tetra-cyclines	Protein synthesis, 30S	Bacteriostatic	0.75	8	intermediate	2	sensitive	0.25	lintermediate_to_sensitive	lost	no	1.33525	1	complete loss
TET8	TET	TET8a	FOX	Cefoxitin	Chephalosporins	Cell wall	Bactericidal	4	24	intermediate	8	sensitive	0.333333	lintermediate_to_sensitive	lost	no	1.33525	1	complete loss
TET8	TET	TET8a	CHL	Chloramphenicol	Chloramphenicol	Protein synthesis, 50S	Bacteriostatic	3	32	resistant	6	sensitive	0.1875	resistant_to_sensitive	lost	no	1.33525	1	complete loss
TET8	TET	TET8b	TET	Tetracycline	Tetra-cyclines	Protein synthesis, 30S	Bacteriostatic	0.5	8	intermediate	0.5	sensitive	0.0625	lintermediate_to_sensitive	lost	yes	1.33593	1	complete loss
TET8	TET	TET8b	DOX	Doxycycline	Tetra-cyclines	Protein synthesis, 30S	Bacteriostatic	0.75	8	intermediate	2	sensitive	0.25	lintermediate_to_sensitive	lost	no	1.33593	1	complete loss
TET8	TET	TET8b	FOX	Cefoxitin	Chephalosporins	Cell wall	Bactericidal	4	24	intermediate	8	sensitive	0.333333	lintermediate_to_sensitive	lost	no	1.33593	1	complete loss
TET8	TET	TET8b	CHL	Chloramphenicol	Chloramphenicol	Protein synthesis, 50S	Bacteriostatic	3	32	resistant	4	sensitive	0.125	resistant_to_sensitive	lost	no	1.33593	1	complete loss
TET8	TET	TET8c	TET	Tetracycline	Tetra-cyclines	Protein synthesis, 30S	Bacteriostatic	0.5	8	intermediate	0.38	sensitive	0.0475	lintermediate_to_sensitive	lost	yes	1.29866	0.75	partial loss
TET8	TET	TET8c	DOX	Doxycycline	Tetra-cyclines	Protein synthesis, 30S	Bacteriostatic	0.75	8	intermediate	1.5	sensitive	0.1875	lintermediate_to_sensitive	lost	no	1.29866	0.75	partial loss
TET8	TET	TET8c	FOX	Cefoxitin	Chephalosporins	Cell wall	Bactericidal	4	24	intermediate	12	intermediate	0.5	intermediate_to_intermediate	maintained	no	1.29866	0.75	partial loss
TET8	TET	TET8c	CHL	Chloramphenicol	Chloramphenicol	Protein synthesis, 50S	Bacteriostatic	3	32	resistant	4	sensitive	0.125	resistant_to_sensitive	lost	no	1.29866	0.75	partial loss
TET8	TET	TET8d	TET	Tetracycline	Tetra-cyclines	Protein synthesis, 30S	Bacteriostatic	0.5	8	intermediate	0.38	sensitive	0.0475	lintermediate_to_sensitive	lost	yes	1.19278	0.75	partial loss
TET8	TET	TET8d	DOX	Doxycycline	Tetra-cyclines	Protein synthesis, 30S	Bacteriostatic	0.75	8	intermediate	0.75	sensitive	0.09375	lintermediate_to_sensitive	lost	no	1.19278	0.75	partial loss
TET8	TET	TET8d	FOX	Cefoxitin	Chephalosporins	Cell wall	Bactericidal	4	24	intermediate	12	intermediate	0.5	intermediate_to_intermediate	maintained	no	1.19278	0.75	partial loss
TET8	TET	TET8d	CHL	Chloramphenicol	Chloramphenicol	Protein synthesis, 50S	Bacteriostatic	3	32	resistant	4	sensitive	0.125	resistant_to_sensitive	lost	no	1.19278	0.75	partial loss
TET8	TET	TET8e	TET	Tetracycline	Tetra-cyclines	Protein synthesis, 30S	Bacteriostatic	0.5	8	intermediate	0.38	sensitive	0.0475	lintermediate_to_sensitive	lost	yes	1.21128	0.75	partial loss
TET8	TET	TET8e	DOX	Doxycycline	Tetra-cyclines	Protein synthesis, 30S	Bacteriostatic	0.75	8	intermediate	0.75	sensitive	0.09375	lintermediate_to_sensitive	lost	no	1.21128	0.75	partial loss
TET8	TET	TET8e	FOX	Cefoxitin	Chephalosporins	Cell wall	Bactericidal	4	24	intermediate	12	intermediate	0.5	intermediate_to_intermediate	maintained	no	1.21128	0.75	partial loss
TET8	TET	TET8e	CHL	Chloramphenicol	Chloramphenicol	Protein synthesis, 50S	Bacteriostatic	3	32	resistant	4	sensitive	0.125	resistant_to_sensitive	lost	no	1.21128	0.75	partial loss
TET8	TET	TET8f	TET	Tetracycline	Tetra-cyclines	Protein synthesis, 30S	Bacteriostatic	0.5	8	intermediate	0.75	sensitive	0.09375	lintermediate_to_sensitive	lost	yes	1.31572	1	complete loss
TET8	TET	TET8f	DOX	Doxycycline	Tetra-cyclines	Protein synthesis, 30S	Bacteriostatic	0.75	8	intermediate	0.75	sensitive	0.09375	lintermediate_to_sensitive	lost	no	1.31572	1	complete loss
TET8	TET	TET8f	FOX	Cefoxitin	Chephalosporins	Cell wall	Bactericidal	4	24	intermediate	2	sensitive	0.0833333	lintermediate_to_sensitive	lost	no	1.31572	1	complete loss
TET8	TET	TET8f	CHL	Chloramphenicol	Chloramphenicol	Protein synthesis, 50S	Bacteriostatic	3	32	resistant	4	sensitive	0.125	resistant_to_sensitive	lost	no	1.31572	1	complete loss
TOB4	TOB	TOB4d	TOB	Tobramycin	Aminoglycosides	Protein synthesis, 30S	Bactericidal	0.38	256	resistant	128	resistant	0.5	resistant_to_resistant	maintained	yes	1.16051	0	no loss
TOB8	TOB	TOB8a	TOB	Tobramycin	Aminoglycosides	Protein synthesis, 30S	Bactericidal	0.38	256	resistant	256	resistant	1	resistant_to_resistant	maintained	yes	1.14234	0	no loss
TOB8	TOB	TOB8a	KAN	Kanamycin	Aminoglycosides	Protein synthesis, 30S	Bactericidal	2	256	resistant	256	resistant	1	resistant_to_resistant	maintained	no	1.14234	0	no loss
TOB8	TOB	TOB8c	TOB	Tobramycin	Aminoglycosides	Protein synthesis, 30S	Bactericidal	0.38	256	resistant	256	resistant	1	resistant_to_resistant	maintained	yes	1.24001	0	no loss
TOB8	TOB	TOB8c	KAN	Kanamycin	Aminoglycosides	Protein synthesis, 30S	Bactericidal	2	256	resistant	256	resistant	1	resistant_to_resistant	maintained	no	1.24001	0	no loss
TOB8	TOB	TOB8e	TOB	Tobramycin	Aminoglycosides	Protein synthesis, 30S	Bactericidal	0.38	256	resistant	256	resistant	1	resistant_to_resistant	maintained	yes	1.1349	0	no loss
TOB8	TOB	TOB8e	KAN	Kanamycin	Aminoglycosides	Protein synthesis, 30S	Bactericidal	2	256	resistant	256	resistant	1	resistant_to_resistant	maintained	no	1.1349	0	no loss
TOB8	TOB	TOB8f	TOB	Tobramycin	Aminoglycosides	Protein synthesis, 30S	Bactericidal	0.38	256	resistant	256	resistant	1	resistant_to_resistant	maintained	yes	1.08382	0	no loss
TOB8	TOB	TOB8f	KAN	Kanamycin	Aminoglycosides	Protein synthesis, 30S	Bactericidal	2	256	resistant	256	resistant	1	resistant_to_resistant	maintained	no	1.08382	0	no loss
TOB9	TOB	TOB9d	TOB	Tobramycin	Aminoglycosides	Protein synthesis, 30S	Bactericidal	0.38	256	resistant	24	resistant	0.09375	resistant_to_resistant	maintained	yes	1.16175	0	no loss
TOB9	TOB	TOB9e	TOB	Tobramycin	Aminoglycosides	Protein synthesis, 30S	Bactericidal	0.38	256	resistant	12	intermediate	0.046875	resistant_to_intermediate	lost	yes	1.18786	1	complete loss
TOB10	TOB	TOB10b	TOB	Tobramycin	Aminoglycosides	Protein synthesis, 30S	Bactericidal	0.38	128	resistant	32	resistant	0.25	resistant_to_resistant	maintained	yes	1.06147	0	no loss
TOB10	TOB	TOB10b	KAN	Kanamycin	Aminoglycosides	Protein synthesis, 30S	Bactericidal	2	256	resistant	256	resistant	1	resistant_to_resistant	maintained	no	1.06147	0	no loss
TOB10	TOB	TOB10c	TOB	Tobramycin	Aminoglycosides	Protein synthesis, 30S	Bactericidal	0.38	128	resistant	32	resistant	0.25	resistant_to_resistant	maintained	yes	1.07714	0	no loss
TOB10	TOB	TOB10c	KAN	Kanamycin	Aminoglycosides	Protein synthesis, 30S	Bactericidal	2	256	resistant	128	resistant	0.5	resistant_to_resistant	maintained	no	1.07714	0	no loss
TOB10	TOB	TOB10e	TOB	Tobramycin	Aminoglycosides	Protein synthesis, 30S	Bactericidal	0.38	128	resistant	32	resistant	0.25	resistant_to_resistant	maintained	yes	1.11191	0	no loss
TOB10	TOB	TOB10e	KAN	Kanamycin	Aminoglycosides	Protein synthesis, 30S	Bactericidal	2	256	resistant	256	resistant	1	resistant_to_resistant	maintained	no	1.11191	0	no loss
TOB10	TOB	TOB10f	TOB	Tobramycin	Aminoglycosides	Protein synthesis, 30S	Bactericidal	0.38	128	resistant	64	resistant	0.5	resistant_to_resistant	maintained	yes	1.37959	0.5	partial loss
TOB10	TOB	TOB10f	KAN	Kanamycin	Aminoglycosides	Protein synthesis, 30S	Bactericidal	2	256	resistant	32	intermediate	0.125	resistant_to_intermediate	lost	no	1.37959	0.5	partial loss
TMP2	TMP	TMP2b	TMP	Trimethoprim	Trimethropim	Folic acid biosynthesis	Bacteriostatic	2	32	resistant	32	resistant	1	resistant_to_resistant	maintained	yes	1.11953	0	no loss
TMP7	TMP	TMP7b	TMP	Trimethoprim	Trimethropim	Folic acid biosynthesis	Bacteriostatic	2	32	resistant	32	resistant	1	resistant_to_resistant	maintained	yes	1.08212	0.333333	partial loss
TMP7	TMP	TMP7b	AMP	Ampicillin	Penicillin	Cell wall	Bactericidal	2	16	intermediate	12	intermediate	0.75	intermediate_to_intermediate	maintained	no	1.08212	0.333333	partial loss
TMP7	TMP	TMP7b	FOX	Cefoxitin	Chephalosporins	Cell wall	Bactericidal	4	16	intermediate	8	sensitive	0.5	lintermediate_to_sensitive	lost	no	1.08212	0.333333	partial loss
TMP9	TMP	TMP9a	TMP	Trimethoprim	Trimethropim	Folic acid biosynthesis	Bacteriostatic	2	16	resistant	2	sensitive	0.125	resistant_to_sensitive	lost	yes	1.21607	1	complete loss
TMP9	TMP	TMP9a	CHL	Chloramphenicol	Chloramphenicol	Protein synthesis, 50S	Bacteriostatic	3	128	resistant	3	sensitive	0.0234375	resistant_to_sensitive	lost	no	1.21607	1	complete loss
TMP9	TMP	TMP9a	FOX	Cefoxitin	Chephalosporins	Cell wall	Bactericidal	4	24	intermediate	2	sensitive	0.0833333	lintermediate_to_sensitive	lost	no	1.21607	1	complete loss
TMP9	TMP	TMP9a	NAL	Nalidixic acid	Quinolones	Gyrase	Bactericidal	3	24	intermediate	1.5	sensitive	0.0625	lintermediate_to_sensitive	lost	no	1.21607	1	complete loss
TMP9	TMP	TMP9b	TMP	Trimethoprim	Trimethropim	Folic acid biosynthesis	Bacteriostatic	2	16	resistant	12	intermediate	0.75	resistant_to_intermediate	lost	yes	1.07112	0.75	partial loss
TMP9	TMP	TMP9b	CHL	Chloramphenicol	Chloramphenicol	Protein synthesis, 50S	Bacteriostatic	3	128	resistant	32	resistant	0.25	resistant_to_resistant	maintained	no	1.07112	0.75	partial loss
TMP9	TMP	TMP9b	FOX	Cefoxitin	Chephalosporins	Cell wall	Bactericidal	4	24	intermediate	6	sensitive	0.25	lintermediate_to_sensitive	lost	no	1.07112	0.75	partial loss
TMP9	TMP	TMP9b	NAL	Nalidixic acid	Quinolones	Gyrase	Bactericidal	3	24	intermediate	12	sensitive	0.5	lintermediate_to_sensitive	lost	no	1.07112	0.75	partial loss
TMP9	TMP	TMP9c	TMP	Trimethoprim	Trimethropim	Folic acid biosynthesis	Bacteriostatic	2	16	resistant	8	sensitive	0.5	resistant_to_sensitive	lost	yes	1.18434	1	complete loss
TMP9	TMP	TMP9c	CHL	Chloramphenicol	Chloramphenicol	Protein synthesis, 50S	Bacteriostatic	3	128	resistant	4	sensitive	0.03125	resistant_to_sensitive	lost	no	1.18434	1	complete loss
TMP9	TMP	TMP9c	FOX	Cefoxitin	Chephalosporins	Cell wall	Bactericidal	4	24	intermediate	4	sensitive	0.166667	lintermediate_to_sensitive	lost	no	1.18434	1	complete loss
TMP9	TMP	TMP9c	NAL	Nalidixic acid	Quinolones	Gyrase	Bactericidal	3	24	intermediate	2	sensitive	0.0833333	lintermediate_to_sensitive	lost	no	1.18434	1	complete loss
TMP9	TMP	TMP9e	TMP	Trimethoprim	Trimethropim	Folic acid biosynthesis	Bacteriostatic	2	16	resistant	12	intermediate	0.75	resistant_to_intermediate	lost	yes	1.05484	0.5	partial loss
TMP9	TMP	TMP9e	CHL	Chloramphenicol	Chloramphenicol	Protein synthesis, 50S	Bacteriostatic	3	128	resistant	32	resistant	0.25	resistant_to_resistant	maintained	no	1.05484	0.5	partial loss
TMP9	TMP	TMP9e	FOX	Cefoxitin	Chephalosporins	Cell wall	Bactericidal	4	24	intermediate	12	intermediate	0.5	intermediate_to_intermediate	maintained	no	1.05484	0.5	partial loss
TMP9	TMP	TMP9e	NAL	Nalidixic acid	Quinolones	Gyrase	Bactericidal	3	24	intermediate	12	sensitive	0.5	lintermediate_to_sensitive	lost	no	1.05484	0.5	partial loss
TMP9	TMP	TMP9f	TMP	Trimethoprim	Trimethropim	Folic acid biosynthesis	Bacteriostatic	2	16	resistant	16	resistant	1	resistant_to_resistant	maintained	yes	1.1037	0.75	partial loss
TMP9	TMP	TMP9f	CHL	Chloramphenicol	Chloramphenicol	Protein synthesis, 50S	Bacteriostatic	3	128	resistant	16	intermediate	0.125	resistant_to_intermediate	lost	no	1.1037	0.75	partial loss
TMP9	TMP	TMP9f	FOX	Cefoxitin	Chephalosporins	Cell wall	Bactericidal	4	24	intermediate	8	sensitive	0.333333	lintermediate_to_sensitive	lost	no	1.1037	0.75	partial loss
TMP9	TMP	TMP9f	NAL	Nalidixic acid	Quinolones	Gyrase	Bactericidal	3	24	intermediate	4	sensitive	0.166667	lintermediate_to_sensitive	lost	no	1.1037	0.75	partial loss
TMP10	TMP	TMP10a	TMP	Trimethoprim	Trimethropim	Folic acid biosynthesis	Bacteriostatic	2	32	resistant	32	resistant	1	resistant_to_resistant	maintained	yes	1.08109	0.6	partial loss
TMP10	TMP	TMP10a	DOX	Doxycycline	Tetra-cyclines	Protein synthesis, 30S	Bacteriostatic	0.75	6	intermediate	4	sensitive	0.666667	lintermediate_to_sensitive	lost	no	1.08109	0.6	partial loss
TMP10	TMP	TMP10a	AMP	Ampicillin	Penicillin	Cell wall	Bactericidal	2	48	resistant	8	sensitive	0.166667	resistant_to_sensitive	lost	no	1.08109	0.6	partial loss
TMP10	TMP	TMP10a	NAL	Nalidixic acid	Quinolones	Gyrase	Bactericidal	3	32	resistant	16	sensitive	0.5	resistant_to_sensitive	lost	no	1.08109	0.6	partial loss
TMP10	TMP	TMP10a	FOX	Cefoxitin	Chephalosporins	Cell wall	Bactericidal	4	64	resistant	48	resistant	0.75	resistant_to_resistant	maintained	no	1.08109	0.6	partial loss
TMP10	TMP	TMP10b	TMP	Trimethoprim	Trimethropim	Folic acid biosynthesis	Bacteriostatic	2	32	resistant	32	resistant	1	resistant_to_resistant	maintained	yes	1.19255	0.6	partial loss
TMP10	TMP	TMP10b	DOX	Doxycycline	Tetra-cyclines	Protein synthesis, 30S	Bacteriostatic	0.75	6	intermediate	2	sensitive	0.333333	lintermediate_to_sensitive	lost	no	1.19255	0.6	partial loss
TMP10	TMP	TMP10b	AMP	Ampicillin	Penicillin	Cell wall	Bactericidal	2	48	resistant	12	intermediate	0.25	resistant_to_intermediate	lost	no	1.19255	0.6	partial loss
TMP10	TMP	TMP10b	NAL	Nalidixic acid	Quinolones	Gyrase	Bactericidal	3	32	resistant	8	sensitive	0.25	resistant_to_sensitive	lost	no	1.19255	0.6	partial loss
TMP10	TMP	TMP10b	FOX	Cefoxitin	Chephalosporins	Cell wall	Bactericidal	4	64	resistant	48	resistant	0.75	resistant_to_resistant	maintained	no	1.19255	0.6	partial loss

## Sheet: Fig4A
T0 line	T60 line	Antibiotic tested to	Own antibiotic	Relative MIC fold-change	Relative fitness
AMP8	AMP8e	AMP	yes	0.0625	1.0908
CHL2	CHL2b	CHL	yes	1	1.07176
CHL2	CHL2f	CHL	yes	1	1.11746
CIP5	CIP5a	CIP	yes	0.166667	1.33883
CIP5	CIP5b	CIP	yes	0.166667	1.28311
CIP5	CIP5c	CIP	yes	0.166667	1.78603
CIP5	CIP5d	CIP	yes	0.166667	1.50325
CIP5	CIP5e	CIP	yes	0.166667	1.11177
CIP5	CIP5f	CIP	yes	0.166667	1.55705
CIP9	CIP9a	CIP	yes	1	1.44236
CIP9	CIP9b	CIP	yes	1	1.15184
CIP9	CIP9f	CIP	yes	1	1.17422
DOX3	DOX3a	DOX	yes	0.0833333	1.25202
DOX3	DOX3b	DOX	yes	0.0625	1.36637
DOX3	DOX3c	DOX	yes	0.666667	1.28686
DOX3	DOX3d	DOX	yes	0.0416667	1.17064
DOX3	DOX3e	DOX	yes	0.125	1.21894
FOX8	FOX8a	FOX	yes	1	1.12856
FOX8	FOX8b	FOX	yes	1	1.28495
FOX8	FOX8c	FOX	yes	0.75	1.07227
FOX8	FOX8e	FOX	yes	0.375	1.09461
FOX8	FOX8f	FOX	yes	0.375	1.14885
KAN1	KAN1a	KAN	yes	1	1.14475
KAN1	KAN1b	KAN	yes	1	1.21067
KAN1	KAN1c	KAN	yes	1	1.2695
KAN1	KAN1d	KAN	yes	1	1.47351
KAN1	KAN1e	KAN	yes	1	1.32097
KAN1	KAN1f	KAN	yes	1	1.26849
KAN4	KAN4a	KAN	yes	1	1.13951
KAN4	KAN4b	KAN	yes	1	1.4052
KAN4	KAN4c	KAN	yes	1	1.16246
KAN4	KAN4d	KAN	yes	1	1.08854
KAN4	KAN4e	KAN	yes	1	1.17411
KAN4	KAN4f	KAN	yes	1	1.1183
KAN8	KAN8a	KAN	yes	0.166667	1.37199
NIT8	NIT8a	NIT	yes	1	1.04488
NIT8	NIT8b	NIT	yes	1	1.35261
NIT8	NIT8d	NIT	yes	1	1.12563
NIT8	NIT8e	NIT	yes	1	1.11902
TET3	TET3a	TET	yes	0.0416667	1.15439
TET3	TET3b	TET	yes	0.0416667	1.29843
TET3	TET3c	TET	yes	0.0416667	1.34143
TET3	TET3d	TET	yes	0.0625	1.36908
TET3	TET3e	TET	yes	0.0416667	1.3871
TET3	TET3f	TET	yes	0.0416667	1.3039
TET8	TET8a	TET	yes	0.0625	1.33525
TET8	TET8b	TET	yes	0.0625	1.33593
TET8	TET8c	TET	yes	0.0475	1.29866
TET8	TET8d	TET	yes	0.0475	1.19278
TET8	TET8e	TET	yes	0.0475	1.21128
TET8	TET8f	TET	yes	0.09375	1.31572
TOB4	TOB4d	TOB	yes	0.5	1.16051
TOB8	TOB8a	TOB	yes	1	1.14234
TOB8	TOB8c	TOB	yes	1	1.24001
TOB8	TOB8e	TOB	yes	1	1.1349
TOB8	TOB8f	TOB	yes	1	1.08382
TOB9	TOB9d	TOB	yes	0.09375	1.16175
TOB9	TOB9e	TOB	yes	0.046875	1.18786
TOB10	TOB10b	TOB	yes	0.25	1.06147
TOB10	TOB10c	TOB	yes	0.25	1.07714
TOB10	TOB10e	TOB	yes	0.25	1.11191
TOB10	TOB10f	TOB	yes	0.5	1.37959
TMP2	TMP2b	TMP	yes	1	1.11953
TMP7	TMP7b	TMP	yes	1	1.08212
TMP9	TMP9a	TMP	yes	0.125	1.21607
TMP9	TMP9b	TMP	yes	0.75	1.07112
TMP9	TMP9c	TMP	yes	0.5	1.18434
TMP9	TMP9e	TMP	yes	0.75	1.05484
TMP9	TMP9f	TMP	yes	1	1.1037
TMP10	TMP10a	TMP	yes	1	1.08109
TMP10	TMP10b	TMP	yes	1	1.19255
TMP10	TMP10b	DOX	no	0.333333	1.19255
TMP10	TMP10b	AMP	no	0.25	1.19255
TMP10	TMP10b	NAL	no	0.25	1.19255
TMP10	TMP10b	FOX	no	0.75	1.19255

## Sheet: Fig4B
T0 line	T60 line	Antibiotic tested to	Change of resistance profile	Relative fitness
AMP8	AMP8e	AMP	complete loss	1.0908
CHL2	CHL2b	CHL	partial loss	1.07176
CHL2	CHL2b	TET	partial loss	1.07176
CHL2	CHL2b	NAL	partial loss	1.07176
CHL2	CHL2b	FOX	partial loss	1.07176
CHL2	CHL2f	CHL	partial loss	1.11746
CHL2	CHL2f	TET	partial loss	1.11746
CHL2	CHL2f	NAL	partial loss	1.11746
CHL2	CHL2f	FOX	partial loss	1.11746
CIP5	CIP5a	CIP	partial loss	1.33883
CIP5	CIP5a	NAL	partial loss	1.33883
CIP5	CIP5b	CIP	partial loss	1.28311
CIP5	CIP5b	NAL	partial loss	1.28311
CIP5	CIP5c	CIP	partial loss	1.78603
CIP5	CIP5c	NAL	partial loss	1.78603
CIP5	CIP5d	CIP	partial loss	1.50325
CIP5	CIP5d	NAL	partial loss	1.50325
CIP5	CIP5e	CIP	partial loss	1.11177
CIP5	CIP5e	NAL	partial loss	1.11177
CIP5	CIP5f	CIP	partial loss	1.55705
CIP5	CIP5f	NAL	partial loss	1.55705
CIP9	CIP9a	CIP	no loss	1.44236
CIP9	CIP9a	NAL	no loss	1.44236
CIP9	CIP9a	AMP	no loss	1.44236
CIP9	CIP9a	FOX	no loss	1.44236
CIP9	CIP9b	CIP	no loss	1.15184
CIP9	CIP9b	NAL	no loss	1.15184
CIP9	CIP9b	AMP	no loss	1.15184
CIP9	CIP9b	FOX	no loss	1.15184
CIP9	CIP9f	CIP	no loss	1.17422
CIP9	CIP9f	NAL	no loss	1.17422
CIP9	CIP9f	AMP	no loss	1.17422
CIP9	CIP9f	FOX	no loss	1.17422
DOX3	DOX3a	DOX	complete loss	1.25202
DOX3	DOX3a	TET	complete loss	1.25202
DOX3	DOX3a	CHL	complete loss	1.25202
DOX3	DOX3a	AMP	complete loss	1.25202
DOX3	DOX3a	NAL	complete loss	1.25202
DOX3	DOX3a	FOX	complete loss	1.25202
DOX3	DOX3b	DOX	complete loss	1.36637
DOX3	DOX3b	TET	complete loss	1.36637
DOX3	DOX3b	CHL	complete loss	1.36637
DOX3	DOX3b	AMP	complete loss	1.36637
DOX3	DOX3b	NAL	complete loss	1.36637
DOX3	DOX3b	FOX	complete loss	1.36637
DOX3	DOX3c	DOX	partial loss	1.28686
DOX3	DOX3c	TET	partial loss	1.28686
DOX3	DOX3c	CHL	partial loss	1.28686
DOX3	DOX3c	AMP	partial loss	1.28686
DOX3	DOX3c	NAL	partial loss	1.28686
DOX3	DOX3c	FOX	partial loss	1.28686
DOX3	DOX3d	DOX	complete loss	1.17064
DOX3	DOX3d	TET	complete loss	1.17064
DOX3	DOX3d	CHL	complete loss	1.17064
DOX3	DOX3d	AMP	complete loss	1.17064
DOX3	DOX3d	NAL	complete loss	1.17064
DOX3	DOX3d	FOX	complete loss	1.17064
DOX3	DOX3e	DOX	complete loss	1.21894
DOX3	DOX3e	TET	complete loss	1.21894
DOX3	DOX3e	CHL	complete loss	1.21894
DOX3	DOX3e	AMP	complete loss	1.21894
DOX3	DOX3e	NAL	complete loss	1.21894
DOX3	DOX3e	FOX	complete loss	1.21894
FOX8	FOX8a	FOX	partial loss	1.12856
FOX8	FOX8a	AMP	partial loss	1.12856
FOX8	FOX8b	FOX	partial loss	1.28495
FOX8	FOX8b	AMP	partial loss	1.28495
FOX8	FOX8c	FOX	no loss	1.07227
FOX8	FOX8c	AMP	no loss	1.07227
FOX8	FOX8e	FOX	no loss	1.09461
FOX8	FOX8e	AMP	no loss	1.09461
FOX8	FOX8f	FOX	partial loss	1.14885
FOX8	FOX8f	AMP	partial loss	1.14885
KAN1	KAN1a	KAN	no loss	1.14475
KAN1	KAN1b	KAN	no loss	1.21067
KAN1	KAN1c	KAN	no loss	1.2695
KAN1	KAN1d	KAN	no loss	1.47351
KAN1	KAN1e	KAN	no loss	1.32097
KAN1	KAN1f	KAN	no loss	1.26849
KAN4	KAN4a	KAN	no loss	1.13951
KAN4	KAN4a	TOB	no loss	1.13951
KAN4	KAN4b	KAN	no loss	1.4052
KAN4	KAN4b	TOB	no loss	1.4052
KAN4	KAN4c	KAN	no loss	1.16246
KAN4	KAN4c	TOB	no loss	1.16246
KAN4	KAN4d	KAN	no loss	1.08854
KAN4	KAN4d	TOB	no loss	1.08854
KAN4	KAN4e	KAN	partial loss	1.17411
KAN4	KAN4e	TOB	partial loss	1.17411
KAN4	KAN4f	KAN	partial loss	1.1183
KAN4	KAN4f	TOB	partial loss	1.1183
KAN8	KAN8a	KAN	complete loss	1.37199
NIT8	NIT8a	NIT	partial loss	1.04488
NIT8	NIT8a	FOX	partial loss	1.04488
NIT8	NIT8b	NIT	partial loss	1.35261
NIT8	NIT8b	FOX	partial loss	1.35261
NIT8	NIT8d	NIT	partial loss	1.12563
NIT8	NIT8d	FOX	partial loss	1.12563
NIT8	NIT8e	NIT	partial loss	1.11902
NIT8	NIT8e	FOX	partial loss	1.11902
TET3	TET3a	TET	complete loss	1.15439
TET3	TET3a	DOX	complete loss	1.15439
TET3	TET3a	FOX	complete loss	1.15439
TET3	TET3b	TET	partial loss	1.29843
TET3	TET3b	DOX	partial loss	1.29843
TET3	TET3b	FOX	partial loss	1.29843
TET3	TET3c	TET	complete loss	1.34143
TET3	TET3c	DOX	complete loss	1.34143
TET3	TET3c	FOX	complete loss	1.34143
TET3	TET3d	TET	complete loss	1.36908
TET3	TET3d	DOX	complete loss	1.36908
TET3	TET3d	FOX	complete loss	1.36908
TET3	TET3e	TET	complete loss	1.3871
TET3	TET3e	DOX	complete loss	1.3871
TET3	TET3e	FOX	complete loss	1.3871
TET3	TET3f	TET	complete loss	1.3039
TET3	TET3f	DOX	complete loss	1.3039
TET3	TET3f	FOX	complete loss	1.3039
TET8	TET8a	TET	complete loss	1.33525
TET8	TET8a	DOX	complete loss	1.33525
TET8	TET8a	FOX	complete loss	1.33525
TET8	TET8a	CHL	complete loss	1.33525
TET8	TET8b	TET	complete loss	1.33593
TET8	TET8b	DOX	complete loss	1.33593
TET8	TET8b	FOX	complete loss	1.33593
TET8	TET8b	CHL	complete loss	1.33593
TET8	TET8c	TET	partial loss	1.29866
TET8	TET8c	DOX	partial loss	1.29866
TET8	TET8c	FOX	partial loss	1.29866
TET8	TET8c	CHL	partial loss	1.29866
TET8	TET8d	TET	partial loss	1.19278
TET8	TET8d	DOX	partial loss	1.19278
TET8	TET8d	FOX	partial loss	1.19278
TET8	TET8d	CHL	partial loss	1.19278
TET8	TET8e	TET	partial loss	1.21128
TET8	TET8e	DOX	partial loss	1.21128
TET8	TET8e	FOX	partial loss	1.21128
TET8	TET8e	CHL	partial loss	1.21128
TET8	TET8f	TET	complete loss	1.31572
TET8	TET8f	DOX	complete loss	1.31572
TET8	TET8f	FOX	complete loss	1.31572
TET8	TET8f	CHL	complete loss	1.31572
TOB4	TOB4d	TOB	no loss	1.16051
TOB8	TOB8a	TOB	no loss	1.14234
TOB8	TOB8a	KAN	no loss	1.14234
TOB8	TOB8c	TOB	no loss	1.24001
TOB8	TOB8c	KAN	no loss	1.24001
TOB8	TOB8e	TOB	no loss	1.1349
TOB8	TOB8e	KAN	no loss	1.1349
TOB8	TOB8f	TOB	no loss	1.08382
TOB8	TOB8f	KAN	no loss	1.08382
TOB9	TOB9d	TOB	no loss	1.16175
TOB9	TOB9e	TOB	complete loss	1.18786
TOB10	TOB10b	TOB	no loss	1.06147
TOB10	TOB10b	KAN	no loss	1.06147
TOB10	TOB10c	TOB	no loss	1.07714
TOB10	TOB10c	KAN	no loss	1.07714
TOB10	TOB10e	TOB	no loss	1.11191
TOB10	TOB10e	KAN	no loss	1.11191
TOB10	TOB10f	TOB	partial loss	1.37959
TOB10	TOB10f	KAN	partial loss	1.37959
TMP2	TMP2b	TMP	no loss	1.11953
TMP7	TMP7b	TMP	partial loss	1.08212
TMP7	TMP7b	AMP	partial loss	1.08212
TMP7	TMP7b	FOX	partial loss	1.08212
TMP9	TMP9a	TMP	complete loss	1.21607
TMP9	TMP9a	CHL	complete loss	1.21607
TMP9	TMP9a	FOX	complete loss	1.21607
TMP9	TMP9a	NAL	complete loss	1.21607
TMP9	TMP9b	TMP	partial loss	1.07112
TMP9	TMP9b	CHL	partial loss	1.07112
TMP9	TMP9b	FOX	partial loss	1.07112
TMP9	TMP9b	NAL	partial loss	1.07112
TMP9	TMP9c	TMP	complete loss	1.18434
TMP9	TMP9c	CHL	complete loss	1.18434
TMP9	TMP9c	FOX	complete loss	1.18434
TMP9	TMP9c	NAL	complete loss	1.18434
TMP9	TMP9e	TMP	partial loss	1.05484
TMP9	TMP9e	CHL	partial loss	1.05484
TMP9	TMP9e	FOX	partial loss	1.05484
TMP9	TMP9e	NAL	partial loss	1.05484
TMP9	TMP9f	TMP	partial loss	1.1037
TMP9	TMP9f	CHL	partial loss	1.1037
TMP9	TMP9f	FOX	partial loss	1.1037
TMP9	TMP9f	NAL	partial loss	1.1037
TMP10	TMP10a	TMP	partial loss	1.08109
TMP10	TMP10a	DOX	partial loss	1.08109
TMP10	TMP10a	AMP	partial loss	1.08109
TMP10	TMP10a	NAL	partial loss	1.08109
TMP10	TMP10a	FOX	partial loss	1.08109
TMP10	TMP10b	TMP	partial loss	1.19255
TMP10	TMP10b	DOX	partial loss	1.19255
TMP10	TMP10b	AMP	partial loss	1.19255
TMP10	TMP10b	NAL	partial loss	1.19255
TMP10	TMP10b	FOX	partial loss	1.19255
