# Supplementary material for: Rapid decline of bacterial drug-resistance in an antibiotic-free environment through phenotypic reversion
Source: eLife journal article supplement (doi:10.7554/elife.47088), 2019-08-16
Supplement: supp [file elife-47088-supp-v1.zip › elife_poa_e47088_Figure_5_source_data_1.xlsx]

## Sheet: Description
Figure 5-source data – Relative fitness, relative MIC and relative Hoechst-dye accumulation of the mutant strains.
Sheet 'Fig5A'	Fitness was measured as the area under the growth curve in an antibiotic-free medium, and was normalized to wild-type fitness.
	Strains	Strains used in the experiment	WT	Wild-type strain
			T0 (DOX)	doxcycline-resistant T0 strain
			WT+marR*	marR* mutation introduced into the wild-type genetic background
			T60+marR*	marR* mutation introduced into the T0 (DOX) genetic background
			T60 (DOX)	T60 lines evolved in antibiotic free environment
	Relative fitness	Relative fitness was calculated as the median of the normalized integral of the technical replicates for each strain divided by the median fitness of the wild-type controls.
Sheet 'Fig5 - fig5 supplement 2A'	Fitness was measured as the area under the growth curve in an antibiotic-free medium, and was normalized to wild-type fitness.
	Strains	Strains used in the experiment	WT	Wild-type strain
			T0 (FOX)	cefoxitin-resistant T0 strain
			WT+envZ*	envZ* mutation introduced into the wild-type genetic background
			T60+envZ*	envZ* mutation introduced into the T0 (FOX) genetic background
			T60 (FOX)	T60 lines evolved in antibiotic free environment
	Relative fitness	Relative fitness was calculated as the median of the normalized integral of the technical replicates for each strain divided by the median fitness of the wild-type controls.
Sheet 'Fig5B'	Minimum inhibitory concentration (MIC) was measured by the standard E-test assay, and was normalized to that of the wild-type strain
	Strains	Strains used in the experiment	WT	Wild-type strain
			T0 (DOX)	doxcycline-resistant T0 strain
			WT+marR*	marR* mutation introduced into the wild-type genetic background
			T60+marR*	marR* mutation introduced into the T0 (DOX) genetic background
			T60 (DOX)	T60 lines evolved in antibiotic free environment.
	Relative MIC	Minimum inhibitory concentration (MIC) normalized to that of the wild-type strain
Sheet 'Fig5 - fig5 supplement 2B'	Minimum inhibitory concentration (MIC) was measured by the standard E-test assay, and was normalized to that of the wild-type strain
	Strains	Strains used in the experiment	WT	Wild-type strain
			T0 strain (FOX)	cefoxitin-resistant T0 strain
			WT+envZ*	envZ* mutation introduced into the wild-type genetic background
			T60+envZ*	envZ* mutation introduced into the T0 (FOX) genetic background
			T60 (FOX)	T60 lines evolved in antibiotic free environment
	Relative MIC	Minimum inhibitory concentration (MIC) normalized to that of the wild-type strain
Sheet 'Fig5C'	Relative Hoechst probe accumulation (a proxy of membrane permeability)
	Strains	Strains used in the experiment	WT	Wild-type strain
			T0 (DOX)	doxcycline-resistant T0 strain
			WT+marR*	marR* mutation introduced into the wild-type genetic background
			T60+marR*	marR* mutation introduced into the T0 (DOX) genetic background
			T60 (DOX)	T60 lines evolved in antibiotic free environment
			CCCP	Wild-type cells treated with a protonophore chemical agent (carbonyl cyanide m-chlorophenyl hydrazone) served as a positive control
	Relative Hoechst accumulation	Intracellular accumulation of the probe in the corresponding strains was normalized to that of the wild-type strain

## Sheet: Fig5A
Strains	Relative fitness
WT	1.01
WT	0.99
WT	1.01
WT	0.99
WT	1.02
WT	1.01
WT	1
WT	1
WT	0.99
WT	1.04
WT+marR*	0.94
WT+marR*	0.94
WT+marR*	0.96
WT+marR*	0.97
WT+marR*	0.95
WT+marR*	0.95
WT+marR*	0.94
WT+marR*	0.96
WT+marR*	0.95
WT+marR*	0.96
T0 (DOX)	0.92
T0 (DOX)	0.97
T0 (DOX)	0.87
T0 (DOX)	0.94
T0 (DOX)	0.92
T0 (DOX)	0.89
T0 (DOX)	0.93
T0 (DOX)	0.9
T0 (DOX)	0.9
T0 (DOX)	0.94
T0+marR*	1.02
T0+marR*	0.94
T0+marR*	0.93
T0+marR*	0.96
T0+marR*	1.04
T0+marR*	0.98
T0+marR*	0.92
T0+marR*	0.93
T0+marR*	0.96
T0+marR*	1.05
T60 (DOX)	1.24
T60 (DOX)	1.12
T60 (DOX)	1.08
T60 (DOX)	1.07
T60 (DOX)	1.12
T60 (DOX)	1.26
T60 (DOX)	1.1
T60 (DOX)	1.11
T60 (DOX)	1.1
T60 (DOX)	1.1

## Sheet: Fig5B
Strains	Antibiotic	Absolute MIC (ug/ml)	Relative MIC
T0 (DOX)	AMP	24	8
T0 (DOX)	CHL	48	12
T0 (DOX)	DOX	24	32
T0 (DOX)	FOX	96	24
T0 (DOX)	NAL	24	8
T0 (DOX)	TET	12	24
T0+marR*	AMP	3	1
T0+marR*	CHL	6	1.5
T0+marR*	DOX	2	2.67
T0+marR*	FOX	4	1
T0+marR*	NAL	6	2
T0+marR*	TET	1	2
T60 (DOX)	AMP	3	1
T60 (DOX)	CHL	6	1.5
T60 (DOX)	DOX	2	2.67
T60 (DOX)	FOX	12	3
T60 (DOX)	NAL	6	2
T60 (DOX)	TET	1	2
WT	AMP	3	1
WT	CHL	4	1
WT	DOX	0.75	1
WT	FOX	4	1
WT	NAL	3	1
WT	TET	0.5	1
WT+marR*	AMP	3	1
WT+marR*	CHL	4	1
WT+marR*	DOX	3	4
WT+marR*	FOX	4	1
WT+marR*	NAL	4	1.33
WT+marR*	TET	0.75	1.5

## Sheet: Fig5C
Strains	Relative Hoechst accumulation
WT	1.06288
WT	0.976355
WT	0.996494
WT	1.08536
WT	1.00183
WT	0.913577
WT	0.998171
WT	1.07899
WT+CCCP	1.68191
WT+CCCP	1.72515
WT+CCCP	1.83508
WT+CCCP	1.7279
WT+CCCP	1.97607
WT+CCCP	1.9188
WT+CCCP	2.03491
WT+CCCP	1.95643
WT+marR*	1.15336
WT+marR*	1.16503
WT+marR*	0.993912
WT+marR*	1.19151
WT+marR*	1.29371
WT+marR*	1.26355
WT+marR*	1.13548
WT+marR*	1.11104
T0 (DOX)	0.316321
T0 (DOX)	0.296118
T0 (DOX)	0.423589
T0 (DOX)	0.34455
T0 (DOX)	0.464367
T0 (DOX)	0.432916
T0 (DOX)	0.380962
T0 (DOX)	0.463514
T0+marR*	1.03411
T0+marR*	1.04604
T0+marR*	1.22253
T0+marR*	1.00809
T0+marR*	1.09717
T0+marR*	1.09067
T0+marR*	1.1337
T0+marR*	1.00721
T60 (DOX)	0.997202
T60 (DOX)	0.881653
T60 (DOX)	1.02475
T60 (DOX)	1.07923
T60 (DOX)	1.09889
T60 (DOX)	0.97509
T60 (DOX)	1.19747
T60 (DOX)	1.05798

## Sheet: Fig5 - fig5 supplement 2A
Strains	Relative fitness
WT	1.01
WT	0.99
WT	1.01
WT	0.99
WT	1.02
WT	1.01
WT	1
WT	1
WT	0.99
WT	1.04
WT+envZ*	0.94
WT+envZ*	0.87
WT+envZ*	0.9
WT+envZ*	0.87
WT+envZ*	0.91
WT+envZ*	0.9
WT+envZ*	0.81
WT+envZ*	0.87
WT+envZ*	0.86
WT+envZ*	0.86
T0 (FOX)	0.78
T0 (FOX)	0.68
T0 (FOX)	0.71
T0 (FOX)	0.7
T0 (FOX)	0.67
T0 (FOX)	0.77
T0 (FOX)	0.68
T0 (FOX)	0.7
T0 (FOX)	0.68
T0 (FOX)	0.66
T0+envZ*	0.86
T0+envZ*	0.82
T0+envZ*	0.85
T0+envZ*	0.79
T0+envZ*	0.83
T0+envZ*	0.85
T0+envZ*	0.85
T0+envZ*	0.81
T0+envZ*	0.82
T0+envZ*	0.84
T60 (FOX)	0.92
T60 (FOX)	0.91
T60 (FOX)	0.83
T60 (FOX)	0.91
T60 (FOX)	0.88
T60 (FOX)	0.89
T60 (FOX)	0.88
T60 (FOX)	0.89
T60 (FOX)	0.87
T60 (FOX)	0.83

## Sheet: Fig5 - fig5 supplement 2B
Strains	Antibiotic	Absolute MIC (ug/ml)	Relative MIC
T0 (FOX)	AMP	48	16
T0 (FOX)	CHL	NA	NA
T0 (FOX)	DOX	NA	NA
T0 (FOX)	FOX	NA	NA
T0 (FOX)	NAL	NA	NA
T0 (FOX)	TET	NA	NA
T0+envZ*	AMP	16	5.33
T0+envZ*	CHL	NA	NA
T0+envZ*	DOX	NA	NA
T0+envZ*	FOX	NA	NA
T0+envZ*	NAL	NA	NA
T0+envZ*	TET	NA	NA
T60 (FOX)	AMP	12	4
T60 (FOX)	CHL	NA	NA
T60 (FOX)	DOX	NA	NA
T60 (FOX)	FOX	NA	NA
T60 (FOX)	NAL	NA	NA
T60 (FOX)	TET	NA	NA
WT	AMP	3	1
WT	CHL	4	1
WT	DOX	0.75	1
WT	FOX	4	1
WT	NAL	3	1
WT	TET	0.5	1
WT+envZ*	AMP	3	1
WT+envZ*	CHL	NA	NA
WT+envZ*	DOX	NA	NA
WT+envZ*	FOX	NA	NA
WT+envZ*	NAL	NA	NA
WT+envZ*	TET	NA	NA
