# Supplementary material for: Rapid decline of bacterial drug-resistance in an antibiotic-free environment through phenotypic reversion
Source: eLife journal article supplement (doi:10.7554/elife.47088), 2019-08-16
Supplement: supp [file elife-47088-supp-v1.zip › elife_poa_e47088_Supplementary_file1.xlsx]

## Sheet: Description
Supplementary Table 4 – Mutations acquired during the 60-day evolution in antibiotic free environment and the corresponding T0 mutations.
Sheet 'T60 mutations'	This spreadsheet contains all newly acquired mutations identified by whole genome sequencing in the T60 evolved lines.
		The 'Gene' coloumn includes the gene in which the mutation appeared or those two genes between which the intergenic mutation appeared.
		Arrows following the gene name indicate gene orientation.
		Arrows in the 'Mutation' coloumn indicate a change in the nucleotide or in the number of nucleotides.
		Asterisk (*) in the 'Mutation' coloumn represents in frame stop codons.
		Genes in [] are partially deleted.
Sheet 'all mutations'	This spreadsheet contains both the original mutations of the corresponding T0 resistant strains (mutations in dark blue) and the newly acquired mutations of the T60 evolved lines (mutations in red).

## Sheet: T60 mutations
line	Gene	Position	Type	Mutation	Annotation
KAN1b	nlpD ←	2,861,510	SNP	A→G	V201V (GTT→GTC)
KAN1b	trkA →	3,430,901	SNP	G→A	S342N (AGC→AAC)
KAN4c	hybF ←	3,133,367	SNP	G→T	S104* (TCG→TAG)
TMP9f	soxR →	4,267,467	SNP	C→T	A24V (GCG→GTG)
CIP5a	gyrA ←	2,332,651	SNP	5 bp→5 bp	coding (245‑249/2628 nt)
DOX3a	lon →	454.355	SNP	G→A	E4E (GAG→GAA)
TOB9e	pgm →	709.397	SNP	G→A	L128L (CTG→CTA)
FOX8c	ompR ←	3,529,601	SNP	G→A	R115C (CGT→TGT)
CIP9f	rho →	3,960,067	insertion	(ACCATC)1→2	coding (291/1260 nt)
CIP9f	tufA ←	3,464,145	insertion	+TC	coding (544/1185 nt)
KAN4c	cvrA ←	1,236,099	insertion	IS1 (–) +8 bp	coding (1422‑1429/1737 nt)
CIP5a	purA →	4,394,760	insertion	(GATGAAAGA)2→3	coding (257/1299 nt)
CIP5a	envZ ←	3,528,734	insertion	(ATAGCATAATCGCCA)1→2	coding (494/1353 nt)
CIP5a	marR →	1,613,734	insertion	+CTGC	coding (358/435 nt)
TOB10b	clpA →	919.984	insertion	+A	coding (1265/2277 nt)
TOB10b	potD ←	1,178,016	insertion	IS1 (–) +9 bp	coding (262‑270/1047 nt)
TOB10f	potD ←	1,178,016	insertion	IS1 (–) +9 bp	coding (262‑270/1047 nt)
TMP9a	ybjH ←	880.656	insertion	IS4 (+) +13 bp	coding (19‑31/285 nt)
TMP9c	soxS ←	4,267,228	insertion	(T)7→8	coding (84/324 nt)
CIP9f	flu →	2,066,579	deletion	Δ594 bp	coding (1560‑2153/3120 nt)
KAN1b	[rph]–[rph]	3,809,219	deletion	Δ82 bp	[rph], [rph]
TOB8a	[rph]–[rph]	3,809,219	deletion	Δ82 bp	[rph], [rph]
TMP9f	[rph]–[rph]	3,809,219	deletion	Δ82 bp	[rph], [rph]
TOB10f	[rph]–[rph]	3,809,219	deletion	Δ82 bp	[rph], [rph]
TOB8a	clpA →	918.773	deletion	Δ2 bp	coding (54‑55/2277 nt)
FOX8b	envZ ←	3,528,849	deletion	Δ1 bp	coding (379/1353 nt)
CIP5a	soxR →	4,267,810	deletion	Δ11 bp	coding (414‑424/465 nt)
DOX3c	kup →	3,925,734	deletion	Δ6 bp	coding (1059‑1064/1869 nt)
CHL2b	pyrE ← / ← rph	3,809,168	deletion	(A)8→7	intergenic (‑40/+26)
TMP9a	pyrE ← / ← rph	3,809,168	deletion	(A)8→7	intergenic (‑40/+26)
TMP9c	pyrE ← / ← rph	3,809,168	deletion	(A)8→7	intergenic (‑40/+26)
TOB10b	pyrE ← / ← rph	3,809,168	deletion	(A)8→7	intergenic (‑40/+26)
KAN4c	ycfP → / → ndh	1,161,409	SNP	G→A	intergenic (+268/‑132)
KAN4c	ydcI ← / → ydcJ	1,489,382	insertion	IS1 (+) +9 bp	intergenic (‑54/‑155)
CIP5a	rplL → / → rpoB	4,171,144	SNP	2 bp→AG	intergenic (+291/‑28)
DOX3a	marC ← / → marR	1,613,342	SNP	T→C	intergenic (‑177/‑35)
DOX3a	yfjL ← / ← yfjM	2,758,815	deletion	Δ8 bp	intergenic (‑303/+50)
DOX3c	sulA ← / → sxy	1,016,417	SNP	A→G	intergenic (‑42/‑177)
DOX3c	yeeP → / → flu	2,064,789	SNP	G→T	intergenic (+97/‑231)
TMP9a	glpT ← / → glpA	2,346,066	SNP	C→A	intergenic (‑213/‑60)
TMP9a	phoP ← / ← purB	1,185,991	deletion	Δ5 bp	intergenic (‑88/+77)
TMP9c	phoP ← / ← purB	1,185,991	deletion	Δ5 bp	intergenic (‑88/+77)
TMP9f	phoP ← / ← purB	1,185,991	deletion	Δ5 bp	intergenic (‑88/+77)

## Sheet: all mutations
line	time point	position	mutation	annotation	gene
CHL2b	T0	479.48	A→C	V127G (GTG→GGG)	acrB ←
CHL2b	T0	481.493	IS5 (+) +4 bp	coding (277‑280/648 nt)	acrR →
CHL2b	T0	879.103	G→A	intergenic (‑259/‑26)	ybjG ← / → mdfA
CHL2b	T0	3,433,524	G→A	L289F (CTC→TTC)	rpoA ←
CHL2b	T60	3,809,168	(A)8→7	intergenic (‑40/+26)	pyrE ← / ← rph
CIP5a	T0	360.752	A→G	V331A (GTG→GCG)	lacI ←
CIP5a	T0	481.442	G→T	E76* (GAG→TAG)	acrR →
CIP5a	T0	2,332,651	C→T	S83S (TCG→TCA)	gyrA ←
CIP5a	T0	4,171,145	T→G	intergenic (+292/‑28)	rplL → / → rpoB
CIP5a	T60	2,332,651	5 bp→5 bp	coding (245‑249/2628 nt)	gyrA ←
CIP5a	T60	4,171,144	2 bp→AG	intergenic (+291/‑28)	rplL → / → rpoB
CIP5a	T60	4,267,810	Δ11 bp	coding (414‑424/465 nt)	soxR →
CIP5a	T60	4,394,760	(GATGAAAGA)2→3	coding (257/1299 nt)	purA →
CIP5a	T60	3,528,734	(ATAGCATAATCGCCA)1→2	coding (494/1353 nt)	envZ ←
CIP5a	T60	1,613,734	+CTGC	coding (358/435 nt)	marR →
CIP9f	T0	247.344	C→A	intergenic (+30/‑41)	lafU → / → dinB
CIP9f	T0	481.481	IS5 (+) +4 bp	coding (265‑268/648 nt)	acrR →
CIP9f	T0	981.427	Δ10 bp	coding (1003‑1012/1089 nt)	ompF ←
CIP9f	T0	1,613,634	(GGAAAGG)1→2	coding (258/435 nt)	marR →
CIP9f	T0	1,860,304	Δ2 bp	coding (425‑426/747 nt)	mipA ←
CIP9f	T0	2,332,640	T→C	D87G (GAC→GGC)	gyrA ←
CIP9f	T0	2,699,006	Δ25 bp	coding (1454‑1478/1800 nt)	lepA ←
CIP9f	T0	3,095,844	Δ2 bp	coding (367‑368/720 nt)	TMPI ←
CIP9f	T0	3,207,832	Δ3 bp	coding (1427‑1429/1842 nt)	rpoD →
CIP9f	T0	3,332,674	+GG	coding (751/810 nt)	mlaF ←
CIP9f	T0	3,370,660	Δ14 bp	coding (107‑120/639 nt)	sspA ←
CIP9f	T0	3,571,169	+GCC	coding (918/996 nt)	gntR ←
CIP9f	T0	3,809,302	Δ1 bp	pseudogene (608/669 nt)	rph ←
CIP9f	T60	3,960,067	(ACCATC)1→2	coding (291/1260 nt)	rho →
CIP9f	T60	3,464,145	+TC	coding (544/1185 nt)	tufA ←
CIP9f	T60	2,066,579	Δ594 bp	coding (1560‑2153/3120 nt)	flu →
DOX3a	T0	481.157	T→C	intergenic (‑82/‑60)	acrA ← / → acrR
DOX3a	T0	1,613,627	T→G	V84G (GTG→GGG)	marR →
DOX3a	T0	3,809,170	Δ1 bp	intergenic (‑42/+24)	pyrE ← / ← rph
DOX3a	T60	1,613,342	T→C	intergenic (‑177/‑35)	marC ← / → marR
DOX3a	T60	454.355	G→A	E4E (GAG→GAA)	lon →
DOX3a	T60	2,758,815	Δ8 bp	intergenic (‑303/+50)	yfjL ← / ← yfjM
DOX3c	T0	481.157	T→C	intergenic (‑82/‑60)	acrA ← / → acrR
DOX3c	T0	1,613,627	T→G	V84G (GTG→GGG)	marR →
DOX3c	T0	3,809,170	Δ1 bp	intergenic (‑42/+24)	pyrE ← / ← rph
DOX3c	T60	3,925,734	Δ6 bp	coding (1059‑1064/1869 nt)	kup →
DOX3c	T60	1,016,417	A→G	intergenic (‑42/‑177)	sulA ← / → sxy
DOX3c	T60	2,064,789	G→T	intergenic (+97/‑231)	yeeP → / → flu
FOX8b	T0	477.976	G→T	F628L (TTC→TTA)	acrB ←
FOX8b	T0	2,305,250	Δ1 bp	coding (979/1104 nt)	ompC ←
FOX8b	T0	3,512,125	A→G	V100A (GTC→GCC)	aroK ←
FOX8b	T0	3,529,618	G→A	P109L (CCG→CTG)	ompR ←
FOX8b	T0	3,809,185	C→T	intergenic (‑57/+9)	pyrE ← / ← rph
FOX8b	T0	4,624,661	C→T	R156H (CGC→CAC)	rob ←
FOX8b	T60	3,528,849	Δ1 bp	coding (379/1353 nt)	envZ ←
FOX8c	T0	477.976	G→T	F628L (TTC→TTA)	acrB ←
FOX8c	T0	2,305,250	Δ1 bp	coding (979/1104 nt)	ompC ←
FOX8c	T0	3,512,125	A→G	V100A (GTC→GCC)	aroK ←
FOX8c	T0	3,529,618	G→A	P109L (CCG→CTG)	ompR ←
FOX8c	T0	3,809,185	C→T	intergenic (‑57/+9)	pyrE ← / ← rph
FOX8c	T0	4,624,661	C→T	R156H (CGC→CAC)	rob ←
FOX8c	T60	3,529,601	G→A	R115C (CGT→TGT)	ompR ←
KAN1b	T0	388.423	Δ5,466 bp	IS3‑mediated	yaiT–[yaiW]
KAN1b	T0	446.837	IS5 (–) +4 bp	coding (227‑230/948 nt)	cyoA ←
KAN1b	T0	3,465,120	T→C	D585G (GAC→GGC)	fusA ←
KAN1b	T0	3,467,682	T→A	H77L (CAC→CTC)	rpsL ←
KAN1b	T0	3,601,549	T→A	V580E (GTG→GAG)	zntA →
KAN1b	T0	3,910,015	A→C	F241V (TTC→GTC)	atpD ←
KAN1b	T0	4,026,755	G→A	G84D (GGT→GAT)	trkH →
KAN1b	T60	2,861,510	A→G	V201V (GTT→GTC)	nlpD ←
KAN1b	T60	3,430,901	G→A	S342N (AGC→AAC)	trkA →
KAN1b	T60	3,809,219	Δ82 bp	[rph], [rph]	[rph]–[rph]
KAN4c	T0	388.423	Δ5,466 bp	IS3‑mediated	yaiT–[yaiW]
KAN4c	T0	446.837	IS5 (+) +4 bp	coding (227‑230/948 nt)	cyoA ←
KAN4c	T0	824.537	T→A	T298S (ACC→TCC)	ybhG ←
KAN4c	T0	2,394,845	Δ1 bp	coding (190/1338 nt)	nuoF ←
KAN4c	T0	3,133,367	G→T	S104* (TCG→TAG)	hybF ←
KAN4c	T0	3,207,160	T→A	L252Q (CTG→CAG)	rpoD →
KAN4c	T0	3,465,073	A→C	F601V (TTT→GTT)	fusA ←
KAN4c	T0	3,465,582	A→T	M431K (ATG→AAG)	fusA ←
KAN4c	T0	3,467,682	T→A	H77L (CAC→CTC)	rpsL ←
KAN4c	T0	3,767,010	T→G	L457R (CTG→CGG)	mtlA →
KAN4c	T0	4,026,743	T→A	L80Q (CTG→CAG)	trkH →
KAN4c	T0	4,062,420	T→A	S73C (AGC→TGC)	yihQ ←
KAN4c	T60	1,161,409	G→A	intergenic (+268/‑132)	ycfP → / → ndh
KAN4c	T60	1,236,099	IS1 (–) +8 bp	coding (1422‑1429/1737 nt)	cvrA ←
KAN4c	T60	1,489,382	IS1 (+) +9 bp	intergenic (‑54/‑155)	ydcI ← / → ydcJ
KAN4c	T60	3,133,367	G→T	S104* (TCG→TAG)	hybF ←
TOB8a	T0	187.375	A→C	E11A (GAG→GCG)	tsf →
TOB8a	T0	388.423	Δ4,219 bp	IS3‑mediated	yaiT–[sbmA]
TOB8a	T0	446.837	IS5 (+) +4 bp	coding (227‑230/948 nt)	cyoA ←
TOB8a	T0	1,178,276	Δ15 bp		[potD]–[potC]
TOB8a	T0	1,986,174	G→A	A42V (GCG→GTG)	pgsA ←
TOB8a	T0	2,080,768	(G)7→8	intergenic (‑173/+42)	yoeI ← / ← yeeY
TOB8a	T0	2,395,369	Δ1 bp	coding (163/501 nt)	nuoE ←
TOB8a	T0	2,449,375	IS5 (+) +4 bp	intergenic (‑250/+428)	yfcV ← / ← sixA
TOB8a	T0	3,465,208	C→A	G556C (GGT→TGT)	fusA ←
TOB8a	T0	3,465,325	G→T	H517N (CAT→AAT)	fusA ←
TOB8a	T0	3,467,682	T→A	H77L (CAC→CTC)	rpsL ←
TOB8a	T0	4,026,743	T→A	L80Q (CTG→CAG)	trkH →
TOB8a	T60	3,809,219	Δ82 bp	[rph], [rph]	[rph]–[rph]
TOB8a	T60	918.773	Δ2 bp	coding (54‑55/2277 nt)	clpA →
TOB9e	T0	61.298	G→T	S656* (TCA→TAA)	rapA ←
TOB9e	T0	388.423	Δ12,767 bp	IS3‑mediated	yaiT–proC
TOB9e	T0	443.8	C→T	W106* (TGG→TAG)	cyoC ←
TOB9e	T0	1,180,593	T→G	Q153P (CAG→CCG)	potA ←
TOB9e	T0	1,986,148	A→T	F51I (TTT→ATT)	pgsA ←
TOB9e	T0	2,080,483	Δ1 bp	coding (61/1359 nt)	plaP ←
TOB9e	T0	3,100,905	G→T	P537Q (CCG→CAG)	speC ←
TOB9e	T0	3,177,134	C→A	intergenic (+452/+38)	zupT → / ← ribB
TOB9e	T0	3,465,045	G→T	P610Q (CCA→CAA)	fusA ←
TOB9e	T0	3,466,333	C→A	G181C (GGT→TGT)	fusA ←
TOB9e	T0	3,910,847	2 bp→GA	coding (778‑779/864 nt)	atpG ←
TOB9e	T0	3,912,025	G→A	A398V (GCA→GTA)	atpA ←
TOB9e	T0	4,026,743	T→G	L80R (CTG→CGG)	trkH →
TOB9e	T60	709.397	G→A	L128L (CTG→CTA)	pgm →
TOB10b	T0	388.423	Δ12,767 bp	IS3‑mediated	yaiT–proC
TOB10b	T0	444.818	Δ15 bp	coding (1266‑1280/1992 nt)	cyoB ←
TOB10b	T0	2,360,814	A→C	S89R (AGT→CGT)	arnC →
TOB10b	T0	2,389,670	C→T	W87* (TGG→TAG)	nuoI ←
TOB10b	T0	3,465,095	A→T	F593L (TTT→TTA)	fusA ←
TOB10b	T0	3,466,164	T→G	Y237S (TAC→TCC)	fusA ←
TOB10b	T60	919.984	+A	coding (1265/2277 nt)	clpA →
TOB10b	T60	1,178,016	IS1 (–) +9 bp	coding (262‑270/1047 nt)	potD ←
TOB10b	T60	3,809,170	Δ1 bp	intergenic (‑42/+24)	pyrE ← / ← rph
TMP9a	T0	455.676	G→T	D445Y (GAT→TAT)	lon →
TMP9a	T0	481.433	IS5 (+) +4 bp	coding (217‑220/648 nt)	acrR →
TMP9a	T0	851.044	Δ16 bp	coding (142‑157/921 nt)	ldtB ←
TMP9a	T0	1,184,682	Δ1 bp	coding (551/1461 nt)	phoQ ←
TMP9a	T0	4,267,833	C→T	A146V (GCA→GTA)	soxR →
TMP9a	T60	2,346,066	C→A	intergenic (‑213/‑60)	glpT ← / → glpA
TMP9a	T60	880.656	IS4 (+) +13 bp	coding (19‑31/285 nt)	ybjH ←
TMP9a	T60	1,185,991	Δ5 bp	intergenic (‑88/+77)	phoP ← / ← purB
TMP9a	T60	3,809,170	Δ1 bp	intergenic (‑42/+24)	pyrE ← / ← rph
TMP9c	T0	455.676	G→T	D445Y (GAT→TAT)	lon →
TMP9c	T0	481.433	IS5 (+) +4 bp	coding (217‑220/648 nt)	acrR →
TMP9c	T0	851.044	Δ16 bp	coding (142‑157/921 nt)	ldtB ←
TMP9c	T0	1,184,682	Δ1 bp	coding (551/1461 nt)	phoQ ←
TMP9c	T0	4,267,833	C→T	A146V (GCA→GTA)	soxR →
TMP9c	T60	4,267,228	(T)7→8	coding (84/324 nt)	soxS ←
TMP9c	T60	1,185,991	Δ5 bp	intergenic (‑88/+77)	phoP ← / ← purB
TMP9c	T60	3,809,170	Δ1 bp	intergenic (‑42/+24)	pyrE ← / ← rph
TMP9f	T0	455.676	G→T	D445Y (GAT→TAT)	lon →
TMP9f	T0	481.433	IS5 (+) +4 bp	coding (217‑220/648 nt)	acrR →
TMP9f	T0	851.044	Δ16 bp	coding (142‑157/921 nt)	ldtB ←
TMP9f	T0	1,184,682	Δ1 bp	coding (551/1461 nt)	phoQ ←
TMP9f	T0	4,267,833	C→T	A146V (GCA→GTA)	soxR →
TMP9f	T60	1,185,991	Δ5 bp	intergenic (‑88/+77)	phoP ← / ← purB
TMP9f	T60	3,809,219	Δ82 bp	[rph], [rph]	[rph]–[rph]
TMP9f	T60	4,267,467	C→T	A24V (GCG→GTG)	soxR →
