# Supplementary figures and images for: Rapid decline of bacterial drug-resistance in an antibiotic-free environment through phenotypic reversion
Source: eLife journal article supplement (doi:10.7554/elife.47088), 2019-08-16

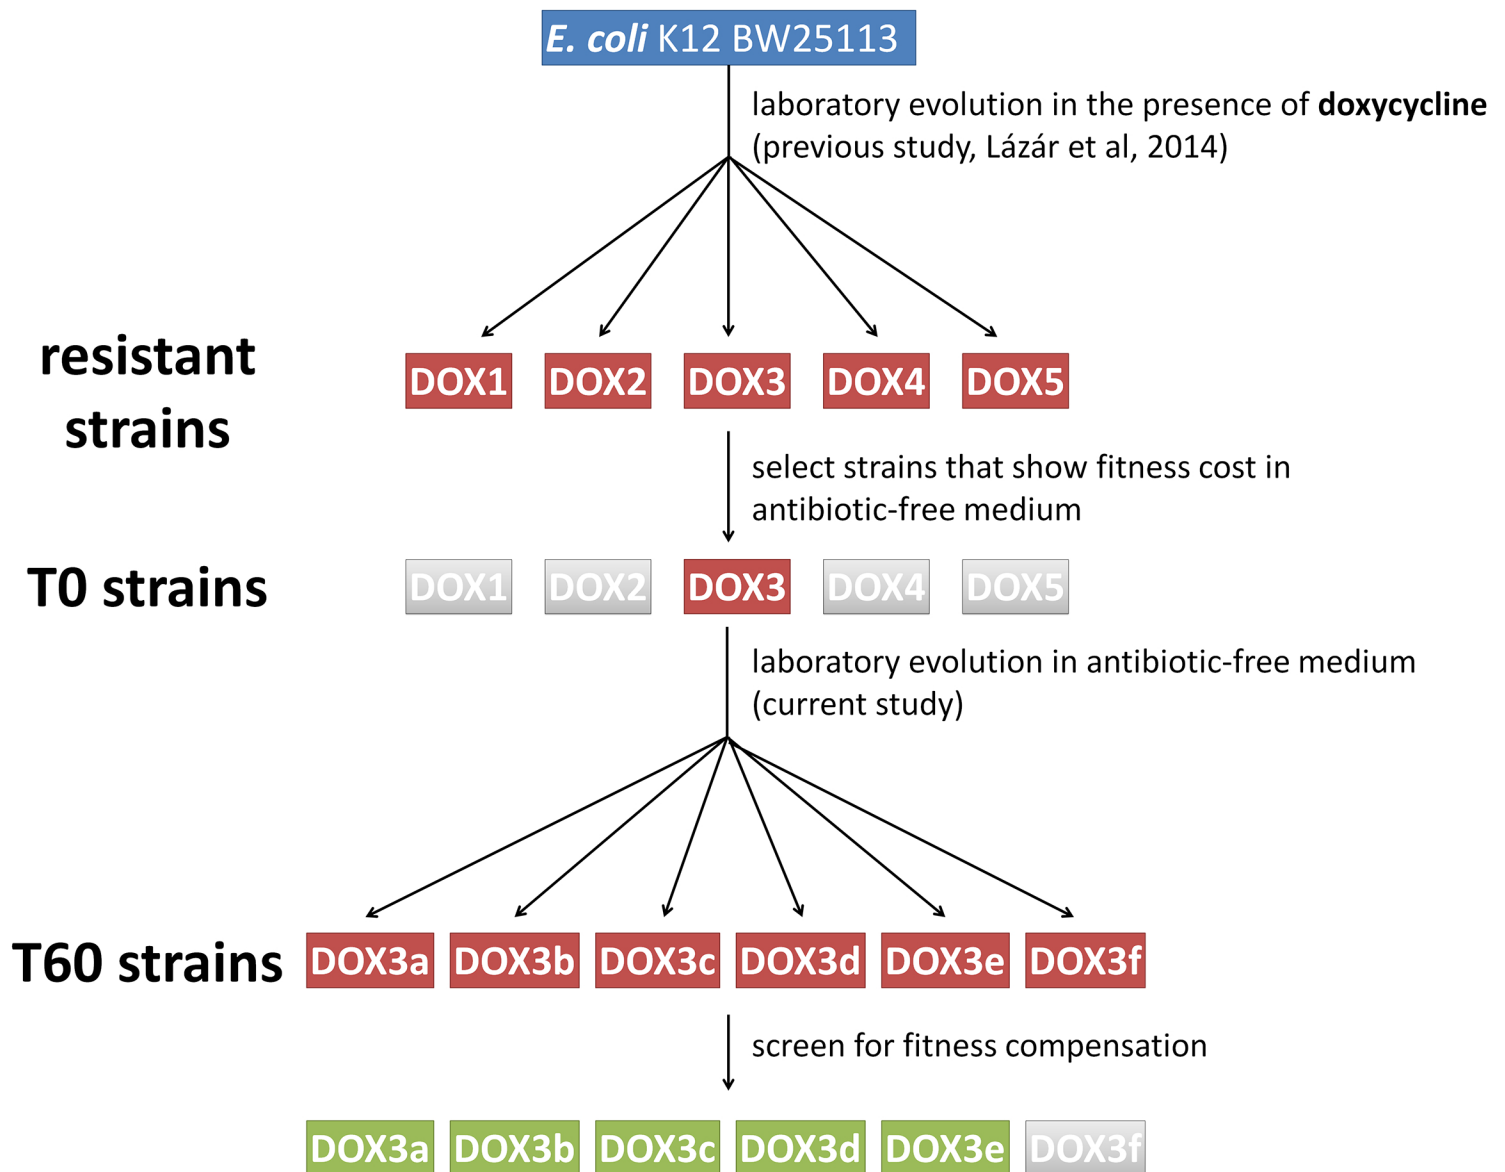

Figure 1-figure supplement 1

Supplement: supp [file elife-47088-supp-v1.zip]

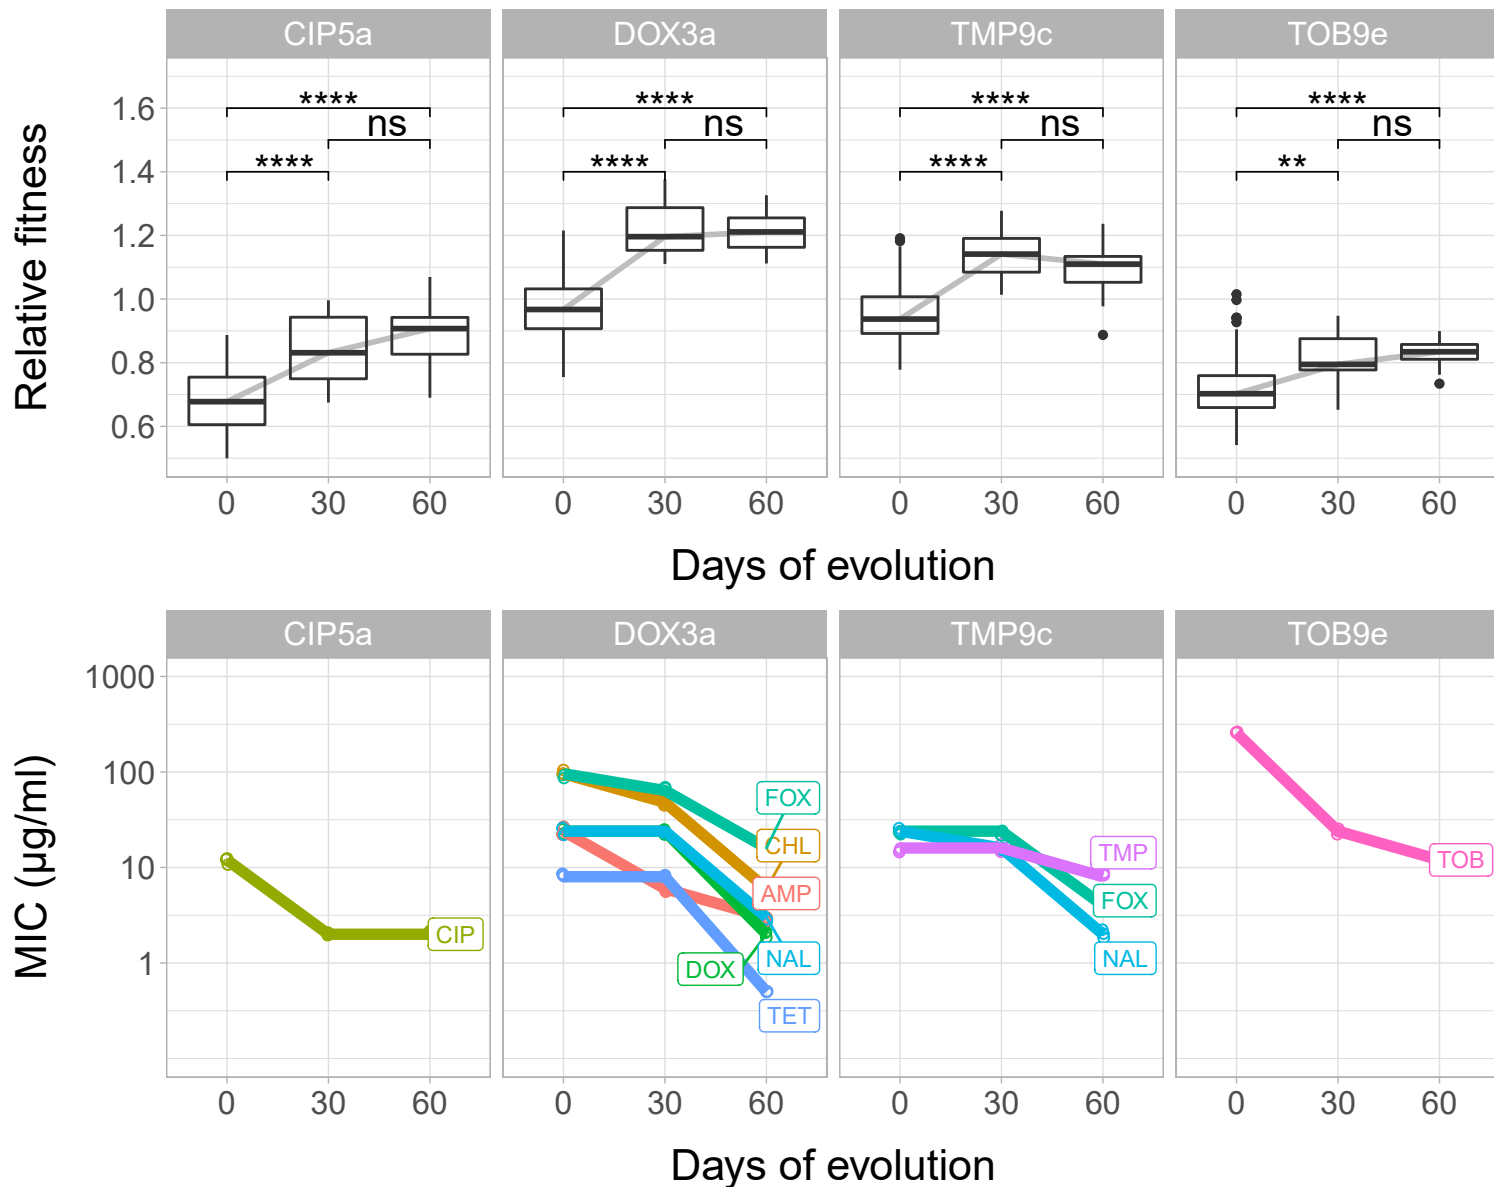

Figure 4-figure supplement 1

Supplement: supp [file elife-47088-supp-v1.zip]

**A**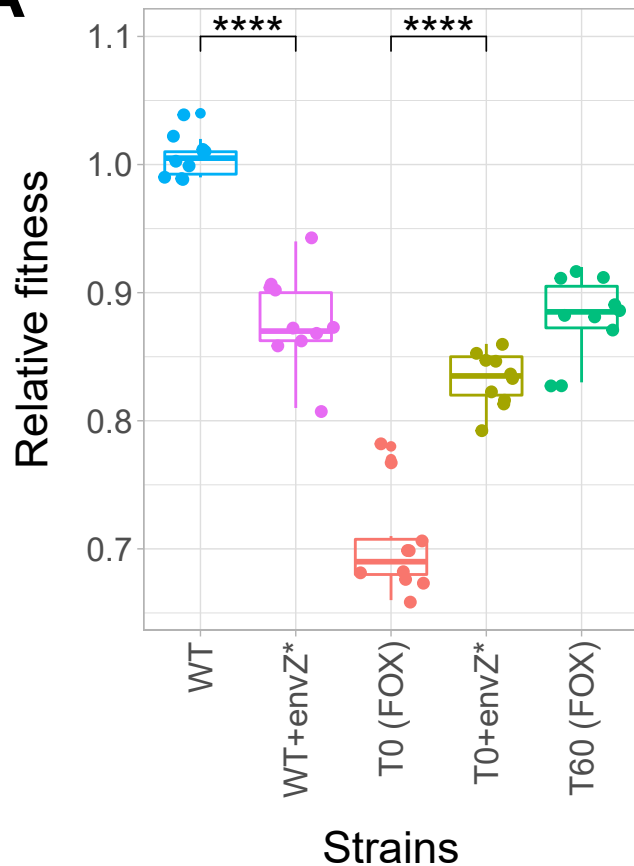**B**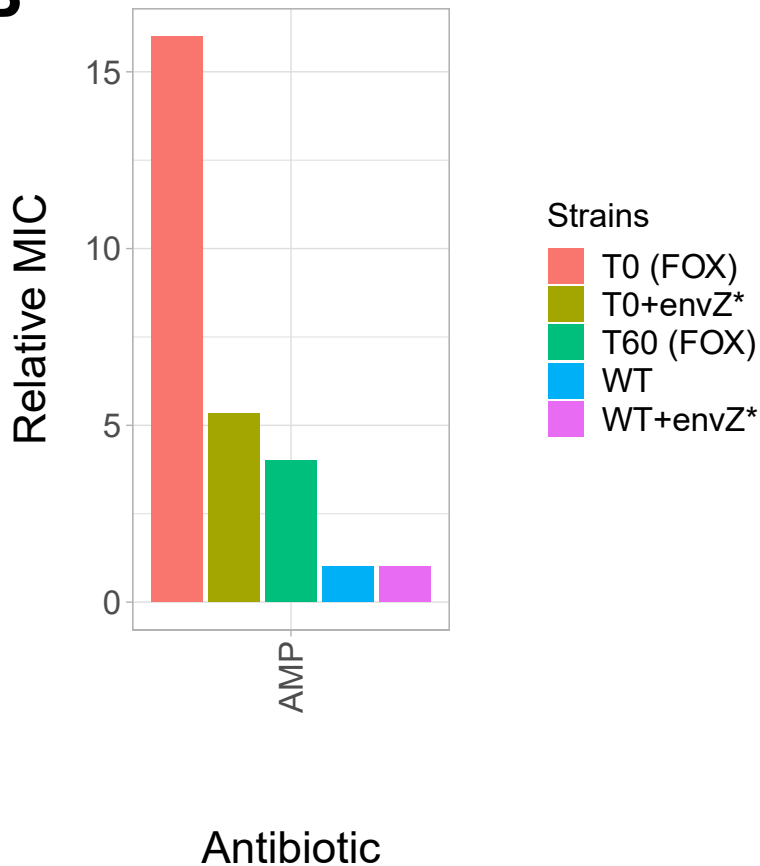

Figure 5-figure supplement 2

Supplement: supp [file elife-47088-supp-v1.zip]

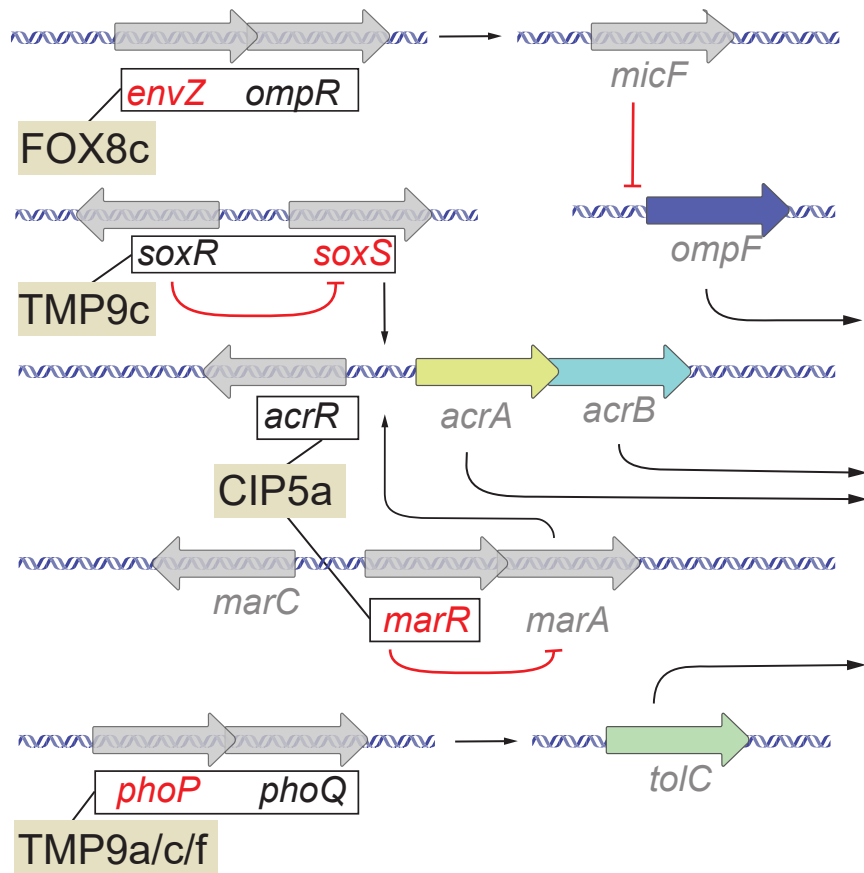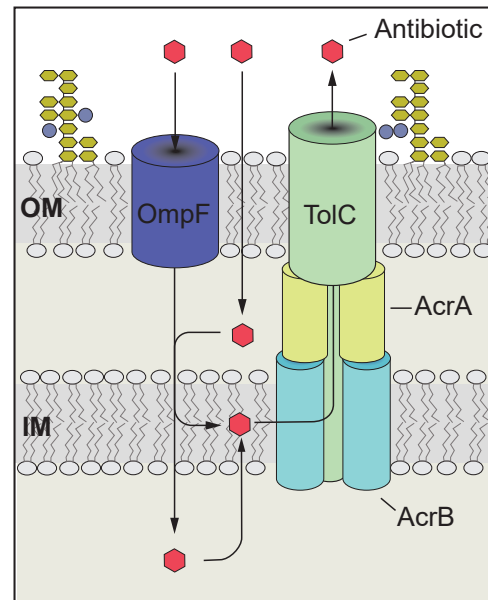

Figure 5-figure supplement 1

Supplement: supp [file elife-47088-supp-v1.zip › elife_poa_e47088_Figure_5_figure_supplement_1.pdf]
